# Supplementary material for: Quantification of the environmental structural risk with spoiling ties: is randomization worthwhile?
Source: Springer Nature journal article supplement (doi:10.1007/s00477-016-1357-9), 2016-11-23
Supplement: 477_2016_1357_MOESM1_ESM.pdf [file 477_2016_1357_MOESM1_ESM.pdf]

# Quantification of the environmental structural risk with spoiling ties: Is randomization worthwhile?

## SUPPLEMENTARY MATERIAL

### *Stochastic Environmental Research and Risk Assessment*

R. Pappadà

Department of Economics, Business, Mathematics and Statistics “Bruno de Finetti”  
University of Trieste, I-34127 Trieste (Italy)  
rpappada@units.it

F. Durante

Faculty of Economics and Management  
Free University of Bozen-Bolzano, I-39100 Bolzano (Italy)  
fabrizio.durante@unibz.it

G. Salvadori

Dipartimento di Matematica e Fisica  
Università del Salento, I-73100 Lecce (Italy)  
gianfausto.salvadori@unisalento.it

September 14, 2016

| $\Delta_H$                | $\Delta_D$ | $C^{\text{Frk}}$ | $C^{\text{Cly}}$ | $C^{\text{Gmb}}$ | $C^{\text{Nrm}}$ | $C^{t,4}$ |
|---------------------------|------------|------------------|------------------|------------------|------------------|-----------|
| Independent randomization |            |                  |                  |                  |                  |           |
| $\tau = 0.25$             |            |                  |                  |                  |                  |           |
| 0.01                      | 0.50       | 0.05124          | 0.79127          | 0.38351          | 0.13594          | 0.26872   |
| 0.10                      | 1.00       | 0.04945          | 0.79477          | 0.39801          | 0.14384          | 0.27942   |
| 0.50                      | 3.00       | 0.07014          | 0.85656          | 0.37201          | 0.21383          | 0.34402   |
| $\tau = 0.5$              |            |                  |                  |                  |                  |           |
| 0.01                      | 0.50       | 0.05024          | 0.99835          | 0.79057          | 0.42781          | 0.70698   |
| 0.10                      | 1.00       | 0.05244          | 0.99865          | 0.78977          | 0.45780          | 0.73238   |
| 0.50                      | 3.00       | 0.13344          | 0.99985          | 0.78817          | 0.68108          | 0.88006   |
| $\tau = 0.75$             |            |                  |                  |                  |                  |           |
| 0.01                      | 0.50       | 0.04695          | 0.99995          | 0.94936          | 0.87446          | 0.95415   |
| 0.10                      | 1.00       | 0.05314          | 0.99995          | 0.95485          | 0.90776          | 0.96545   |
| 0.50                      | 3.00       | 0.48510          | 0.99995          | 0.96105          | 0.98595          | 0.99805   |
| Mixed randomization       |            |                  |                  |                  |                  |           |
| $\tau = 0.25$             |            |                  |                  |                  |                  |           |
| 0.01                      | 0.50       | 0.05624          | 0.78357          | 0.40301          | 0.14954          | 0.28982   |
| 0.10                      | 1.00       | 0.04865          | 0.78467          | 0.39181          | 0.14284          | 0.27142   |
| 0.50                      | 3.00       | 0.06284          | 0.80867          | 0.36471          | 0.17653          | 0.28032   |
| $\tau = 0.5$              |            |                  |                  |                  |                  |           |
| 0.01                      | 0.50       | 0.05134          | 0.99745          | 0.78987          | 0.43161          | 0.70758   |
| 0.10                      | 1.00       | 0.05074          | 0.99705          | 0.79227          | 0.43841          | 0.70018   |
| 0.50                      | 3.00       | 0.08604          | 0.99775          | 0.77617          | 0.53160          | 0.71798   |
| $\tau = 0.75$             |            |                  |                  |                  |                  |           |
| 0.01                      | 0.50       | 0.04665          | 0.99995          | 0.95155          | 0.87826          | 0.95105   |
| 0.10                      | 1.00       | 0.05044          | 0.99995          | 0.95225          | 0.87116          | 0.94086   |
| 0.50                      | 3.00       | 0.26952          | 0.99995          | 0.96675          | 0.94256          | 0.97885   |
| Co-monotone randomization |            |                  |                  |                  |                  |           |
| $\tau = 0.25$             |            |                  |                  |                  |                  |           |
| 0.01                      | 0.50       | 0.05414          | 0.78937          | 0.38831          | 0.14044          | 0.27842   |
| 0.10                      | 1.00       | 0.05454          | 0.77127          | 0.39981          | 0.13644          | 0.26362   |
| 0.50                      | 3.00       | 0.11154          | 0.65968          | 0.51110          | 0.17803          | 0.23263   |
| $\tau = 0.5$              |            |                  |                  |                  |                  |           |
| 0.01                      | 0.50       | 0.05104          | 0.99755          | 0.79537          | 0.43281          | 0.71168   |
| 0.10                      | 1.00       | 0.05124          | 0.99655          | 0.79307          | 0.43211          | 0.68258   |
| 0.50                      | 3.00       | 0.14354          | 0.98635          | 0.86526          | 0.50110          | 0.63939   |
| $\tau = 0.75$             |            |                  |                  |                  |                  |           |
| 0.01                      | 0.50       | 0.04485          | 0.99995          | 0.94456          | 0.87906          | 0.95015   |
| 0.10                      | 1.00       | 0.04625          | 0.99965          | 0.95305          | 0.86916          | 0.93116   |
| 0.50                      | 3.00       | 0.37711          | 0.99995          | 0.98645          | 0.94596          | 0.97625   |

Table 1: **“Frank” case:**  $N = 150$ ,  $B = 10000$ . Probability of rejection (nominal level 5%) of the Null hypothesis that the copula belongs, respectively, to the Frank ( $C^{\text{Frk}}$ ), Clayton ( $C^{\text{Cly}}$ ), Gumbel ( $C^{\text{Gmb}}$ ), Normal ( $C^{\text{Nrm}}$ ), and Student- $t$  ( $C^{t,4}$ , with  $\nu = 4$  degrees of freedom) family, for a random sample generated from a Frank copula, with  $\tau = 0.25, 0.5, 0.75$  obtained from independent repetitions of the discretization and randomization procedures — see text.

| $\Delta_H$                | $\Delta_D$ | $C^{\text{Frk}}$ | $C^{\text{Cly}}$ | $C^{\text{Gmb}}$ | $C^{\text{Nrm}}$ | $C^{\text{U,4}}$ |
|---------------------------|------------|------------------|------------------|------------------|------------------|------------------|
| Independent randomization |            |                  |                  |                  |                  |                  |
| $\tau = 0.25$             |            |                  |                  |                  |                  |                  |
| 0.01                      | 0.50       | 0.04465          | 0.96075          | 0.72028          | 0.25282          | 0.58729          |
| 0.10                      | 1.00       | 0.04515          | 0.96545          | 0.72578          | 0.25852          | 0.58699          |
| 0.50                      | 3.00       | 0.07664          | 0.98395          | 0.71198          | 0.40311          | 0.69888          |
| $\tau = 0.50$             |            |                  |                  |                  |                  |                  |
| 0.01                      | 0.50       | 0.04155          | 0.99995          | 0.98875          | 0.79937          | 0.96845          |
| 0.10                      | 1.00       | 0.04305          | 0.99995          | 0.98985          | 0.82347          | 0.97525          |
| 0.50                      | 3.00       | 0.19843          | 0.99995          | 0.99185          | 0.95615          | 0.99695          |
| $\tau = 0.75$             |            |                  |                  |                  |                  |                  |
| 0.01                      | 0.50       | 0.03545          | 0.99995          | 0.99995          | 0.99725          | 0.99965          |
| 0.10                      | 1.00       | 0.04265          | 0.99995          | 0.99985          | 0.99835          | 0.99975          |
| 0.50                      | 3.00       | 0.78647          | 0.99995          | 0.99985          | 0.99995          | 0.99995          |
| Mixed randomization       |            |                  |                  |                  |                  |                  |
| $\tau = 0.25$             |            |                  |                  |                  |                  |                  |
| 0.01                      | 0.50       | 0.04675          | 0.96225          | 0.72508          | 0.25832          | 0.58509          |
| 0.10                      | 1.00       | 0.04595          | 0.95625          | 0.71688          | 0.26052          | 0.58359          |
| 0.50                      | 3.00       | 0.06414          | 0.96565          | 0.69228          | 0.32792          | 0.59529          |
| $\tau = 0.50$             |            |                  |                  |                  |                  |                  |
| 0.01                      | 0.50       | 0.04275          | 0.99995          | 0.98915          | 0.80207          | 0.96975          |
| 0.10                      | 1.00       | 0.04675          | 0.99995          | 0.99055          | 0.80187          | 0.96585          |
| 0.50                      | 3.00       | 0.10064          | 0.99995          | 0.98765          | 0.87986          | 0.96985          |
| $\tau = 0.75$             |            |                  |                  |                  |                  |                  |
| 0.01                      | 0.50       | 0.03345          | 0.99995          | 0.99995          | 0.99535          | 0.99995          |
| 0.10                      | 1.00       | 0.03945          | 0.99995          | 0.99965          | 0.99645          | 0.99935          |
| 0.50                      | 3.00       | 0.46760          | 0.99995          | 0.99995          | 0.99955          | 0.99985          |
| Co-monotone randomization |            |                  |                  |                  |                  |                  |
| $\tau = 0.25$             |            |                  |                  |                  |                  |                  |
| 0.01                      | 0.50       | 0.04485          | 0.96405          | 0.71368          | 0.25312          | 0.58819          |
| 0.10                      | 1.00       | 0.04225          | 0.94796          | 0.71128          | 0.24493          | 0.55539          |
| 0.50                      | 3.00       | 0.14684          | 0.87166          | 0.84107          | 0.31142          | 0.47770          |
| $\tau = 0.50$             |            |                  |                  |                  |                  |                  |
| 0.01                      | 0.50       | 0.04465          | 0.99995          | 0.98875          | 0.79737          | 0.96805          |
| 0.10                      | 1.00       | 0.04775          | 0.99985          | 0.99025          | 0.78527          | 0.95415          |
| 0.50                      | 3.00       | 0.24703          | 0.99995          | 0.99655          | 0.86776          | 0.93476          |
| $\tau = 0.75$             |            |                  |                  |                  |                  |                  |
| 0.01                      | 0.50       | 0.03445          | 0.99995          | 0.99985          | 0.99605          | 0.99985          |
| 0.10                      | 1.00       | 0.04525          | 0.99995          | 0.99965          | 0.99475          | 0.99885          |
| 0.50                      | 3.00       | 0.71128          | 0.99995          | 0.99995          | 0.99975          | 0.99995          |

Table 2: “Frank” case:  $N = 300$ ,  $B = 10000$ . Same as Table 1.

| $\Delta_H$                | $\Delta_D$ | $C^{\text{Gmb}}$ | $C^{\text{Frk}}$ | $C^{\text{Cly}}$ | $C^{\text{Nrm}}$ | $C^{t,4}$ |
|---------------------------|------------|------------------|------------------|------------------|------------------|-----------|
| Independent randomization |            |                  |                  |                  |                  |           |
| $\tau = 0.25$             |            |                  |                  |                  |                  |           |
| 0.01                      | 0.5        | 0.03699          | 0.3469           | 0.9166           | 0.1949           | 0.2497    |
| 0.1                       | 1          | 0.03699          | 0.3353           | 0.9086           | 0.1909           | 0.2381    |
| 0.5                       | 3          | 0.04138          | 0.3828           | 0.9498           | 0.2821           | 0.3405    |
| $\tau = 0.5$              |            |                  |                  |                  |                  |           |
| 0.01                      | 0.5        | 0.03659          | 0.6803           | 0.9998           | 0.378            | 0.41      |
| 0.1                       | 1          | 0.03938          | 0.6771           | 0.9998           | 0.4044           | 0.4692    |
| 0.5                       | 3          | 0.1098           | 0.7859           | 0.9998           | 0.7123           | 0.7691    |
| $\tau = 0.75$             |            |                  |                  |                  |                  |           |
| 0.01                      | 0.5        | 0.03259          | 0.883            | 0.9998           | 0.4996           | 0.504     |
| 0.1                       | 1          | 0.05858          | 0.8886           | 0.9998           | 0.6539           | 0.6551    |
| 0.5                       | 3          | 0.5672           | 0.9806           | 0.9998           | 0.9842           | 0.987     |
| Mixed randomization       |            |                  |                  |                  |                  |           |
| $\tau = 0.25$             |            |                  |                  |                  |                  |           |
| 0.01                      | 0.5        | 0.03739          | 0.3373           | 0.913            | 0.2033           | 0.2533    |
| 0.1                       | 1          | 0.03619          | 0.3445           | 0.909            | 0.1929           | 0.2437    |
| 0.5                       | 3          | 0.04098          | 0.3457           | 0.919            | 0.2277           | 0.2769    |
| $\tau = 0.5$              |            |                  |                  |                  |                  |           |
| 0.01                      | 0.5        | 0.03778          | 0.6851           | 0.9998           | 0.3884           | 0.4348    |
| 0.1                       | 1          | 0.03739          | 0.6831           | 0.9998           | 0.3964           | 0.4392    |
| 0.5                       | 3          | 0.05738          | 0.7395           | 0.9998           | 0.56             | 0.5684    |
| $\tau = 0.75$             |            |                  |                  |                  |                  |           |
| 0.01                      | 0.5        | 0.03059          | 0.8914           | 0.9998           | 0.4744           | 0.4868    |
| 0.1                       | 1          | 0.03778          | 0.897            | 0.9998           | 0.55             | 0.52      |
| 0.5                       | 3          | 0.2497           | 0.9702           | 0.9998           | 0.9042           | 0.8858    |
| Co-monotone randomization |            |                  |                  |                  |                  |           |
| $\tau = 0.25$             |            |                  |                  |                  |                  |           |
| 0.01                      | 0.5        | 0.03619          | 0.3149           | 0.901            | 0.1849           | 0.2325    |
| 0.1                       | 1          | 0.04098          | 0.3165           | 0.8998           | 0.1781           | 0.2181    |
| 0.5                       | 3          | 0.07937          | 0.3501           | 0.8531           | 0.1741           | 0.1793    |
| $\tau = 0.5$              |            |                  |                  |                  |                  |           |
| 0.01                      | 0.5        | 0.03459          | 0.6847           | 0.9998           | 0.3585           | 0.398     |
| 0.1                       | 1          | 0.03898          | 0.6747           | 0.9998           | 0.3796           | 0.4028    |
| 0.5                       | 3          | 0.08217          | 0.7715           | 0.9998           | 0.4532           | 0.4228    |
| $\tau = 0.75$             |            |                  |                  |                  |                  |           |
| 0.01                      | 0.5        | 0.02779          | 0.8946           | 0.9998           | 0.4948           | 0.4972    |
| 0.1                       | 1          | 0.04138          | 0.8874           | 0.9998           | 0.5344           | 0.498     |
| 0.5                       | 3          | 0.2613           | 0.981            | 0.9998           | 0.8747           | 0.8455    |

Table 3: **“Gumbel” case:**  $N = 150$ ,  $B = 2500$ . Probability of rejection (nominal level 5%) of the Null hypothesis that the copula belongs, respectively, to the Gumbel ( $C^{\text{Gmb}}$ ), Frank ( $C^{\text{Frk}}$ ), Clayton ( $C^{\text{Cly}}$ ), Normal ( $C^{\text{Nrm}}$ ), and Student- $t$  ( $C^{t,4}$ , with  $\nu = 4$  degrees of freedom) family, for a random sample generated from a Gumbel copula, with  $\tau = 0.25, 0.5, 0.75$  obtained from independent repetitions of the discretization and randomization procedures — see text.

| $\Delta_H$                | $\Delta_D$ | $C^{\text{Gmb}}$ | $C^{\text{Frk}}$ | $C^{\text{Cly}}$ | $C^{\text{Nrm}}$ | $C^{t,4}$ |
|---------------------------|------------|------------------|------------------|------------------|------------------|-----------|
| Independent randomization |            |                  |                  |                  |                  |           |
| $\tau = 0.25$             |            |                  |                  |                  |                  |           |
| 0.01                      | 0.5        | 0.04218          | 0.5392           | 0.9906           | 0.3413           | 0.416     |
| 0.1                       | 1          | 0.03739          | 0.5684           | 0.9958           | 0.3349           | 0.4288    |
| 0.5                       | 3          | 0.04538          | 0.6188           | 0.9986           | 0.4808           | 0.6084    |
| $\tau = 0.5$              |            |                  |                  |                  |                  |           |
| 0.01                      | 0.5        | 0.03898          | 0.9334           | 0.9998           | 0.6208           | 0.6779    |
| 0.1                       | 1          | 0.05018          | 0.9262           | 0.9998           | 0.6683           | 0.7147    |
| 0.5                       | 3          | 0.2181           | 0.9682           | 0.9998           | 0.9518           | 0.9718    |
| $\tau = 0.75$             |            |                  |                  |                  |                  |           |
| 0.01                      | 0.5        | 0.03699          | 0.9966           | 0.9998           | 0.7347           | 0.7511    |
| 0.1                       | 1          | 0.05218          | 0.993            | 0.9998           | 0.8966           | 0.8922    |
| 0.5                       | 3          | 0.8858           | 0.9998           | 0.9998           | 0.9998           | 0.9998    |
| Mixed randomization       |            |                  |                  |                  |                  |           |
| $\tau = 0.25$             |            |                  |                  |                  |                  |           |
| 0.01                      | 0.5        | 0.03778          | 0.5688           | 0.9938           | 0.3361           | 0.4308    |
| 0.1                       | 1          | 0.04298          | 0.5524           | 0.9934           | 0.3329           | 0.4148    |
| 0.5                       | 3          | 0.04778          | 0.5752           | 0.997            | 0.4064           | 0.4972    |
| $\tau = 0.5$              |            |                  |                  |                  |                  |           |
| 0.01                      | 0.5        | 0.03379          | 0.9346           | 0.9998           | 0.6567           | 0.6883    |
| 0.1                       | 1          | 0.03579          | 0.9342           | 0.9998           | 0.6539           | 0.6719    |
| 0.5                       | 3          | 0.09776          | 0.9574           | 0.9998           | 0.8367           | 0.8423    |
| $\tau = 0.75$             |            |                  |                  |                  |                  |           |
| 0.01                      | 0.5        | 0.03419          | 0.9966           | 0.9998           | 0.7223           | 0.7307    |
| 0.1                       | 1          | 0.04338          | 0.9946           | 0.9998           | 0.7963           | 0.7487    |
| 0.5                       | 3          | 0.4468           | 0.9998           | 0.9998           | 0.9922           | 0.991     |
| Co-monotone randomization |            |                  |                  |                  |                  |           |
| $\tau = 0.25$             |            |                  |                  |                  |                  |           |
| 0.01                      | 0.5        | 0.04138          | 0.5484           | 0.991            | 0.3361           | 0.4212    |
| 0.1                       | 1          | 0.04338          | 0.532            | 0.9922           | 0.3081           | 0.3701    |
| 0.5                       | 3          | 0.1034           | 0.5924           | 0.9806           | 0.2673           | 0.2749    |
| $\tau = 0.5$              |            |                  |                  |                  |                  |           |
| 0.01                      | 0.5        | 0.03299          | 0.9326           | 0.9998           | 0.6224           | 0.6591    |
| 0.1                       | 1          | 0.04418          | 0.9238           | 0.9998           | 0.61             | 0.6339    |
| 0.5                       | 3          | 0.1246           | 0.9662           | 0.9998           | 0.7283           | 0.6555    |
| $\tau = 0.75$             |            |                  |                  |                  |                  |           |
| 0.01                      | 0.5        | 0.03059          | 0.9946           | 0.9998           | 0.7347           | 0.7351    |
| 0.1                       | 1          | 0.04178          | 0.9962           | 0.9998           | 0.7763           | 0.7183    |
| 0.5                       | 3          | 0.48             | 0.9998           | 0.9998           | 0.9882           | 0.9794    |

Table 4: “Gumbel” case:  $N = 300$ ,  $B = 2500$ . Same as Table 3.

| $\Delta_H$                | $\Delta_D$ | $C^{\text{Cly}}$ | $C^{\text{Frk}}$ | $C^{\text{Gmb}}$ | $C^{\text{Nrm}}$ | $C^{t,4}$ |
|---------------------------|------------|------------------|------------------|------------------|------------------|-----------|
| Independent randomization |            |                  |                  |                  |                  |           |
| $\tau = 0.25$             |            |                  |                  |                  |                  |           |
| 0.01                      | 0.5        | 0.07377          | 0.4364           | 0.8283           | 0.3049           | 0.3856    |
| 0.1                       | 1          | 0.111            | 0.4092           | 0.8195           | 0.3037           | 0.3984    |
| 0.5                       | 3          | 0.4704           | 0.1573           | 0.7327           | 0.2661           | 0.3988    |
| $\tau = 0.5$              |            |                  |                  |                  |                  |           |
| 0.01                      | 0.5        | 0.09696          | 0.9058           | 0.9994           | 0.8171           | 0.8443    |
| 0.1                       | 1          | 0.2829           | 0.8595           | 0.9978           | 0.8335           | 0.883     |
| 0.5                       | 3          | 0.9638           | 0.2689           | 0.991            | 0.7511           | 0.921     |
| $\tau = 0.75$             |            |                  |                  |                  |                  |           |
| 0.01                      | 0.5        | 0.1673           | 0.955            | 0.9998           | 0.9802           | 0.9654    |
| 0.1                       | 1          | 0.7407           | 0.8111           | 0.9998           | 0.9798           | 0.9822    |
| 0.5                       | 3          | 0.9998           | 0.1365           | 0.9946           | 0.9842           | 0.9962    |
| Mixed randomization       |            |                  |                  |                  |                  |           |
| $\tau = 0.25$             |            |                  |                  |                  |                  |           |
| 0.01                      | 0.5        | 0.07257          | 0.4336           | 0.8091           | 0.3029           | 0.38      |
| 0.1                       | 1          | 0.09216          | 0.4176           | 0.8179           | 0.3137           | 0.3988    |
| 0.5                       | 3          | 0.3836           | 0.1821           | 0.7307           | 0.2613           | 0.3609    |
| $\tau = 0.5$              |            |                  |                  |                  |                  |           |
| 0.01                      | 0.5        | 0.09536          | 0.9146           | 0.9994           | 0.8215           | 0.8375    |
| 0.1                       | 1          | 0.1881           | 0.8886           | 0.9982           | 0.8263           | 0.8651    |
| 0.5                       | 3          | 0.8762           | 0.4188           | 0.9974           | 0.7499           | 0.8802    |
| $\tau = 0.75$             |            |                  |                  |                  |                  |           |
| 0.01                      | 0.5        | 0.1549           | 0.9614           | 0.9998           | 0.9778           | 0.9578    |
| 0.1                       | 1          | 0.4336           | 0.9138           | 0.9998           | 0.977            | 0.9726    |
| 0.5                       | 3          | 0.997            | 0.2709           | 0.9994           | 0.975            | 0.993     |
| Co-monotone randomization |            |                  |                  |                  |                  |           |
| $\tau = 0.25$             |            |                  |                  |                  |                  |           |
| 0.01                      | 0.5        | 0.06657          | 0.452            | 0.8343           | 0.3201           | 0.4092    |
| 0.1                       | 1          | 0.08337          | 0.44             | 0.8343           | 0.3249           | 0.3996    |
| 0.5                       | 3          | 0.2225           | 0.4792           | 0.8671           | 0.4524           | 0.4912    |
| $\tau = 0.5$              |            |                  |                  |                  |                  |           |
| 0.01                      | 0.5        | 0.08816          | 0.9082           | 0.9982           | 0.8303           | 0.8419    |
| 0.1                       | 1          | 0.1317           | 0.9114           | 0.999            | 0.8331           | 0.8531    |
| 0.5                       | 3          | 0.6711           | 0.8087           | 0.9998           | 0.8834           | 0.9326    |
| $\tau = 0.75$             |            |                  |                  |                  |                  |           |
| 0.01                      | 0.5        | 0.1429           | 0.9558           | 0.9998           | 0.9818           | 0.9614    |
| 0.1                       | 1          | 0.3257           | 0.945            | 0.9998           | 0.983            | 0.975     |
| 0.5                       | 3          | 0.9842           | 0.6291           | 0.9994           | 0.991            | 0.9974    |

Table 5: **“Clayton” case:**  $N = 150$ ,  $B = 2500$ . Probability of rejection (nominal level 5%) of the Null hypothesis that the copula belongs, respectively, to the Clayton ( $C^{\text{Cly}}$ ), Frank ( $C^{\text{Frk}}$ ), Gumbel ( $C^{\text{Gmb}}$ ), Normal ( $C^{\text{Nrm}}$ ), and Student- $t$  ( $C^{t,4}$ , with  $\nu = 4$  degrees of freedom) family, for a random sample generated from a Clayton copula, with  $\tau = 0.25, 0.5, 0.75$  obtained from independent repetitions of the discretization and randomization procedures — see text.

| $\Delta_H$                | $\Delta_D$ | $C^{\text{Cly}}$ | $C^{\text{Frk}}$ | $C^{\text{Gmb}}$ | $C^{\text{Nrm}}$ | $C^{t,4}$ |
|---------------------------|------------|------------------|------------------|------------------|------------------|-----------|
| Independent randomization |            |                  |                  |                  |                  |           |
| $\tau = 0.25$             |            |                  |                  |                  |                  |           |
| 0.01                      | 0.5        | 0.05978          | 0.7875           | 0.9874           | 0.6387           | 0.7567    |
| 0.1                       | 1          | 0.111            | 0.7659           | 0.9874           | 0.6547           | 0.7839    |
| 0.5                       | 3          | 0.7395           | 0.3389           | 0.9646           | 0.5596           | 0.7959    |
| $\tau = 0.5$              |            |                  |                  |                  |                  |           |
| 0.01                      | 0.5        | 0.09456          | 0.9982           | 0.9998           | 0.9954           | 0.997     |
| 0.1                       | 1          | 0.4408           | 0.9982           | 0.9998           | 0.9946           | 0.9978    |
| 0.5                       | 3          | 0.9998           | 0.6208           | 0.9998           | 0.9894           | 0.9994    |
| $\tau = 0.75$             |            |                  |                  |                  |                  |           |
| 0.01                      | 0.5        | 0.2061           | 0.9998           | 0.9998           | 0.9994           | 0.9994    |
| 0.1                       | 1          | 0.9638           | 0.9986           | 0.9998           | 0.9998           | 0.9998    |
| 0.5                       | 3          | 0.9998           | 0.4144           | 0.9998           | 0.9998           | 0.9998    |
| Mixed randomization       |            |                  |                  |                  |                  |           |
| $\tau = 0.25$             |            |                  |                  |                  |                  |           |
| 0.01                      | 0.5        | 0.06897          | 0.7799           | 0.9882           | 0.6411           | 0.7439    |
| 0.1                       | 1          | 0.1066           | 0.7603           | 0.9862           | 0.6275           | 0.7667    |
| 0.5                       | 3          | 0.6124           | 0.3832           | 0.9646           | 0.5392           | 0.7331    |
| $\tau = 0.5$              |            |                  |                  |                  |                  |           |
| 0.01                      | 0.5        | 0.101            | 0.999            | 0.9998           | 0.9934           | 0.9954    |
| 0.1                       | 1          | 0.2721           | 0.9978           | 0.9998           | 0.995            | 0.9966    |
| 0.5                       | 3          | 0.9822           | 0.8231           | 0.9998           | 0.9906           | 0.9966    |
| $\tau = 0.75$             |            |                  |                  |                  |                  |           |
| 0.01                      | 0.5        | 0.1641           | 0.9998           | 0.9998           | 0.9998           | 0.9998    |
| 0.1                       | 1          | 0.5924           | 0.9998           | 0.9998           | 0.9998           | 0.9998    |
| 0.5                       | 3          | 0.9998           | 0.7571           | 0.9998           | 0.9998           | 0.9998    |
| Co-monotone randomization |            |                  |                  |                  |                  |           |
| $\tau = 0.25$             |            |                  |                  |                  |                  |           |
| 0.01                      | 0.5        | 0.06457          | 0.7875           | 0.9866           | 0.6319           | 0.7515    |
| 0.1                       | 1          | 0.08297          | 0.7803           | 0.993            | 0.6467           | 0.7627    |
| 0.5                       | 3          | 0.3221           | 0.7931           | 0.995            | 0.7775           | 0.8383    |
| $\tau = 0.5$              |            |                  |                  |                  |                  |           |
| 0.01                      | 0.5        | 0.08617          | 0.9994           | 0.9998           | 0.9978           | 0.9982    |
| 0.1                       | 1          | 0.1517           | 0.9978           | 0.9998           | 0.9962           | 0.997     |
| 0.5                       | 3          | 0.8902           | 0.9886           | 0.9998           | 0.9978           | 0.9994    |
| $\tau = 0.75$             |            |                  |                  |                  |                  |           |
| 0.01                      | 0.5        | 0.1525           | 0.9998           | 0.9998           | 0.9998           | 0.9998    |
| 0.1                       | 1          | 0.4464           | 0.9998           | 0.9998           | 0.9998           | 0.9998    |
| 0.5                       | 3          | 0.9998           | 0.9886           | 0.9998           | 0.9998           | 0.9998    |

Table 6: **“Clayton” case:**  $N = 300, B = 2500$ . Same as Table 5.

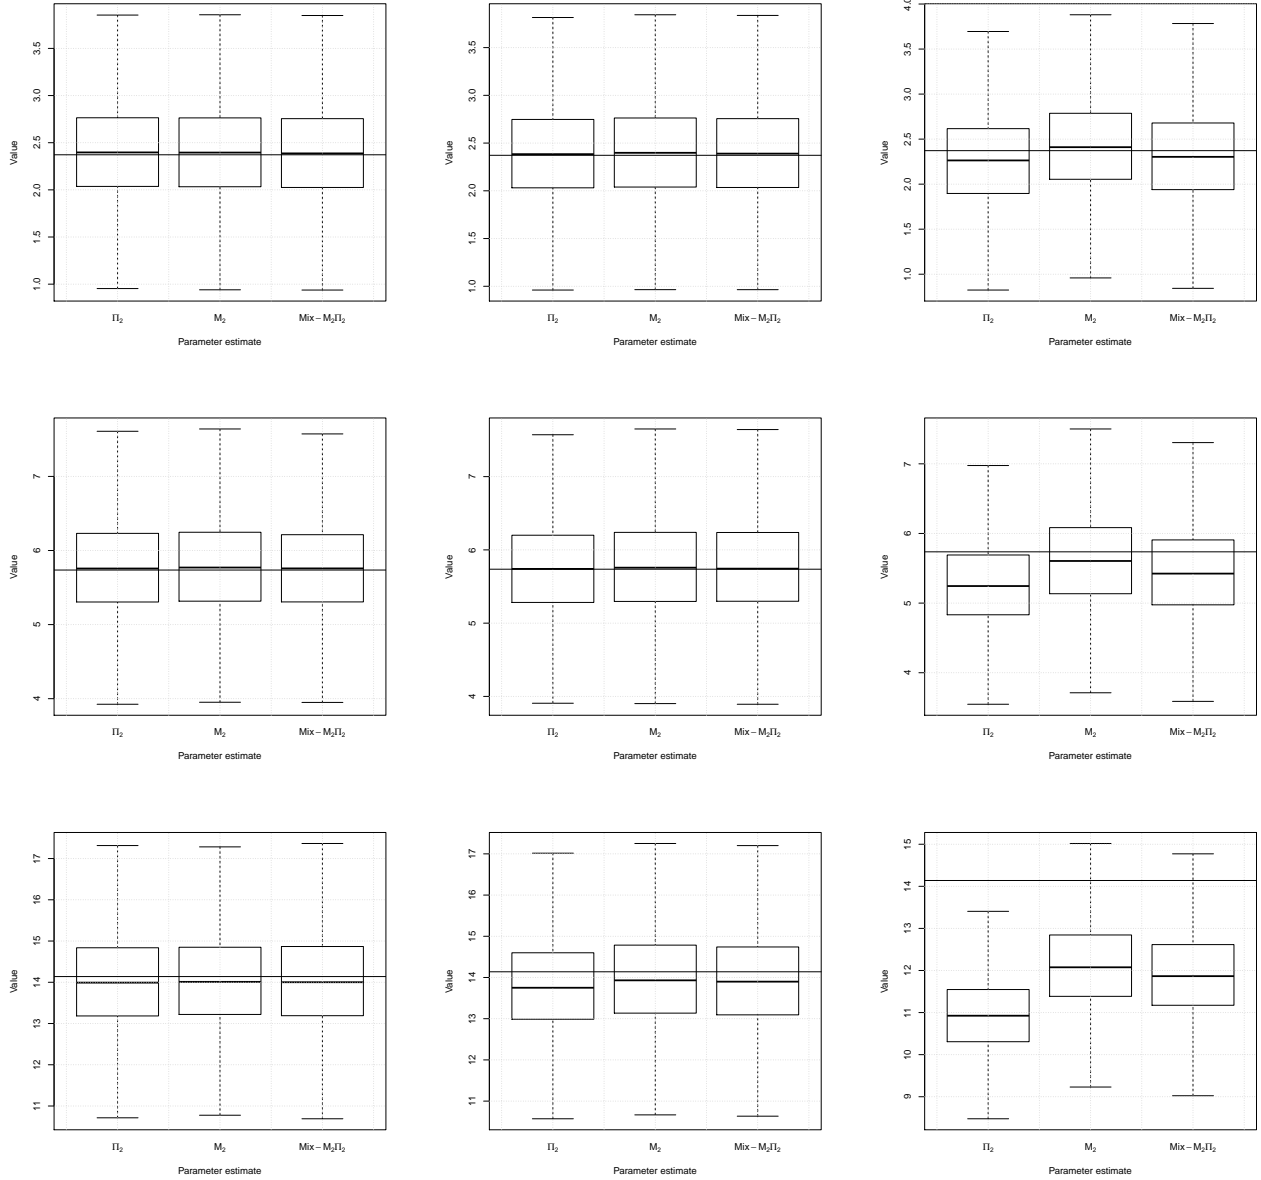

Figure 1: **“Frank” case:**  $N = 150, B = 10000$ . Boxplots of the copula parameter estimates: the horizontal thick lines indicate the “true” values — see text. From top to bottom, the rows correspond, respectively, to the values of the Kendall’s  $\tau = 0.25, 0.5, 0.75$ . From left to right, the columns correspond, respectively, to the following pairs of Height and Duration resolutions:  $(\Delta_H, \Delta_D) \in \{(0.01, 0.5), (0.1, 1), (0.5, 3)\}$ . The labels “ $\Pi_2$ ”, “ $M_2$ ”, and “ $Mix-M_2\Pi_2$ ” denote the use of an independent, a co-monotone, and a mixed randomization, respectively.



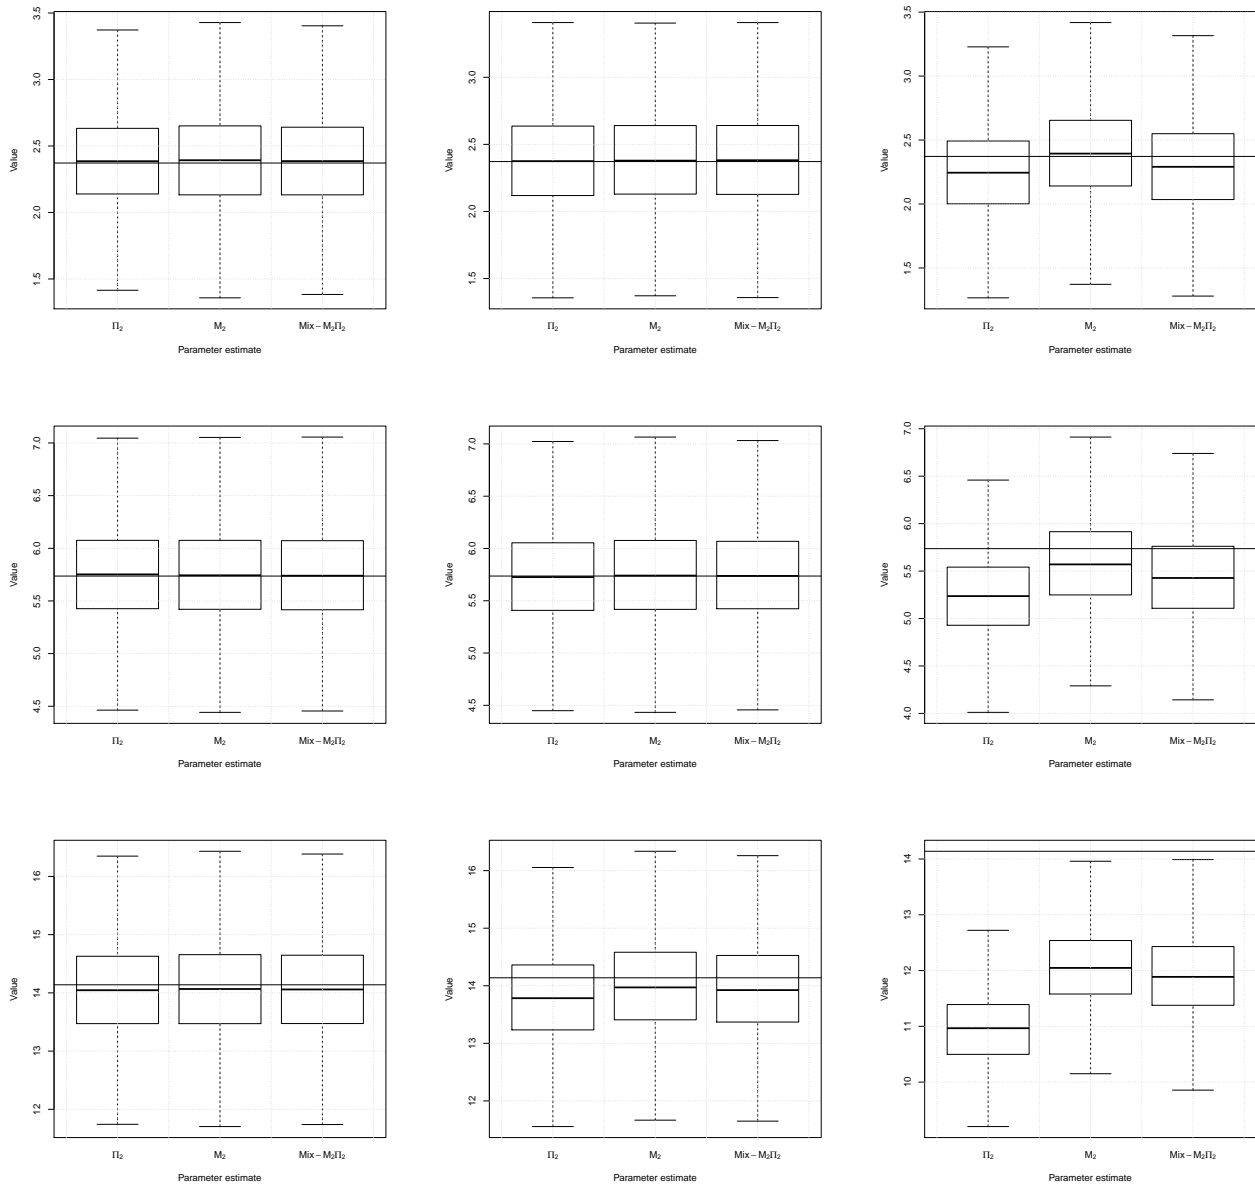

Figure 2: “Frank” case:  $N = 300, B = 10000$ . Same as Fig. 1.

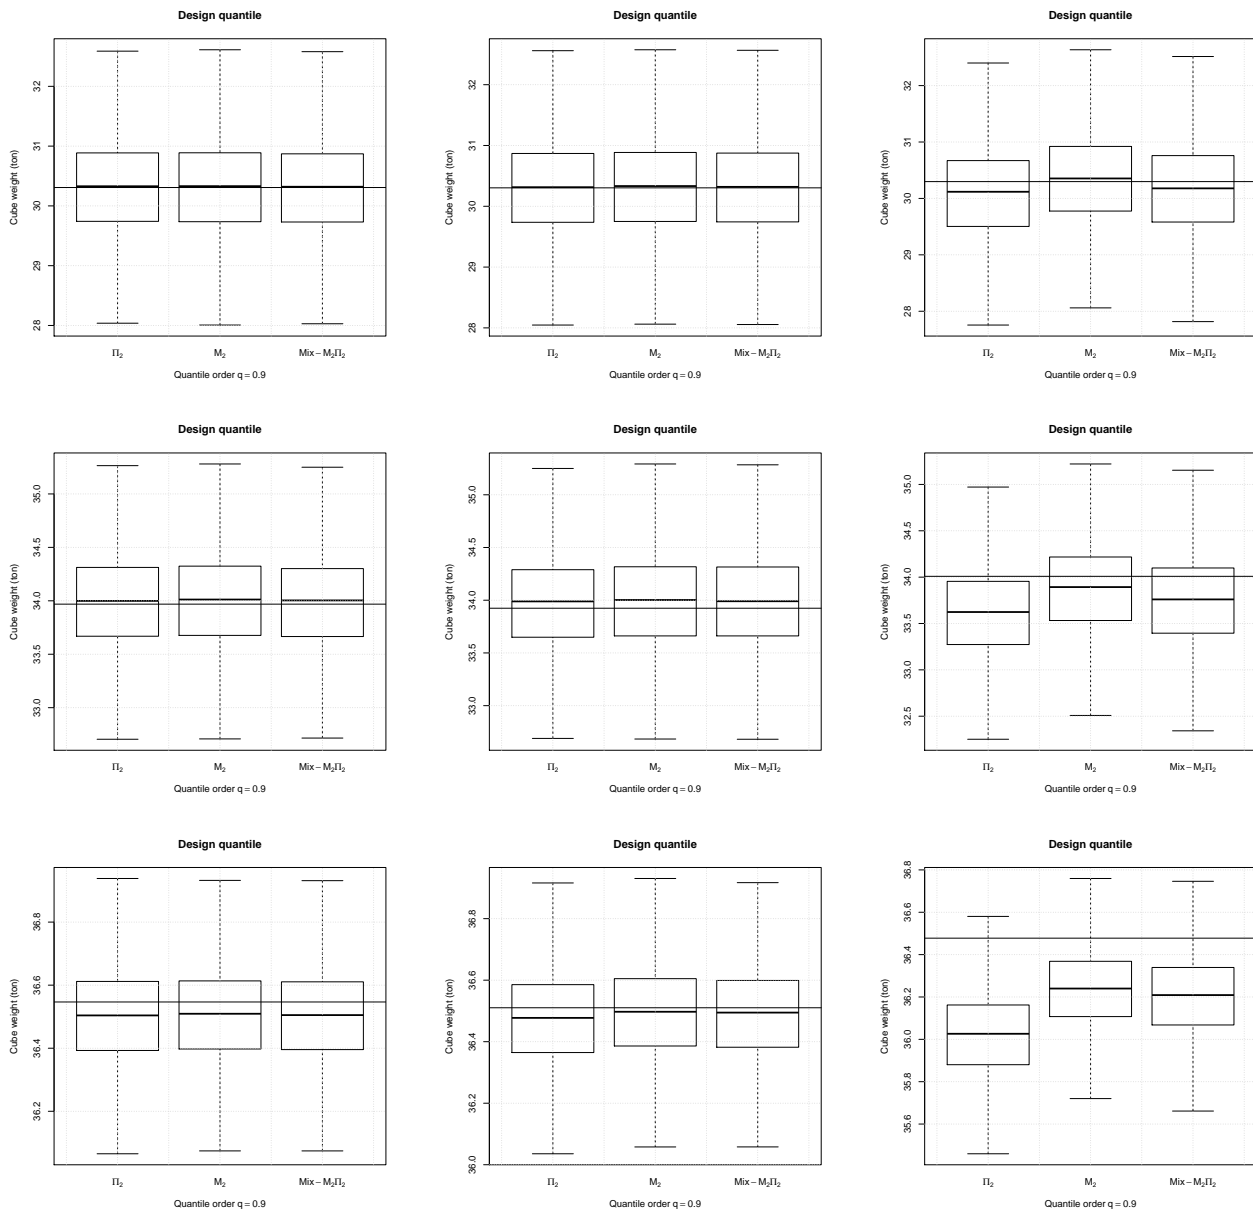

Figure 3: **“Frank” case:**  $N = 150$ ,  $B = 10000$ ,  $q = 0.90$ . Boxplots of the Cube Weight design quantiles estimates: the horizontal thick lines indicate the “true” values — see text. From top to bottom, the rows correspond, respectively, to the values of the Kendall’s  $\tau = 0.25, 0.5, 0.75$ . From left to right, the columns correspond, respectively, to the following pairs of height and duration resolutions:  $(\Delta_H, \Delta_D) \in \{(0.01, 0.5), (0.1, 1), (0.5, 3)\}$ . The labels “ $\Pi_2$ ”, “ $M_2$ ”, and “ $Mix-M_2\Pi_2$ ” denote the use of an independent, a co-monotone, and a mixed randomization, respectively.

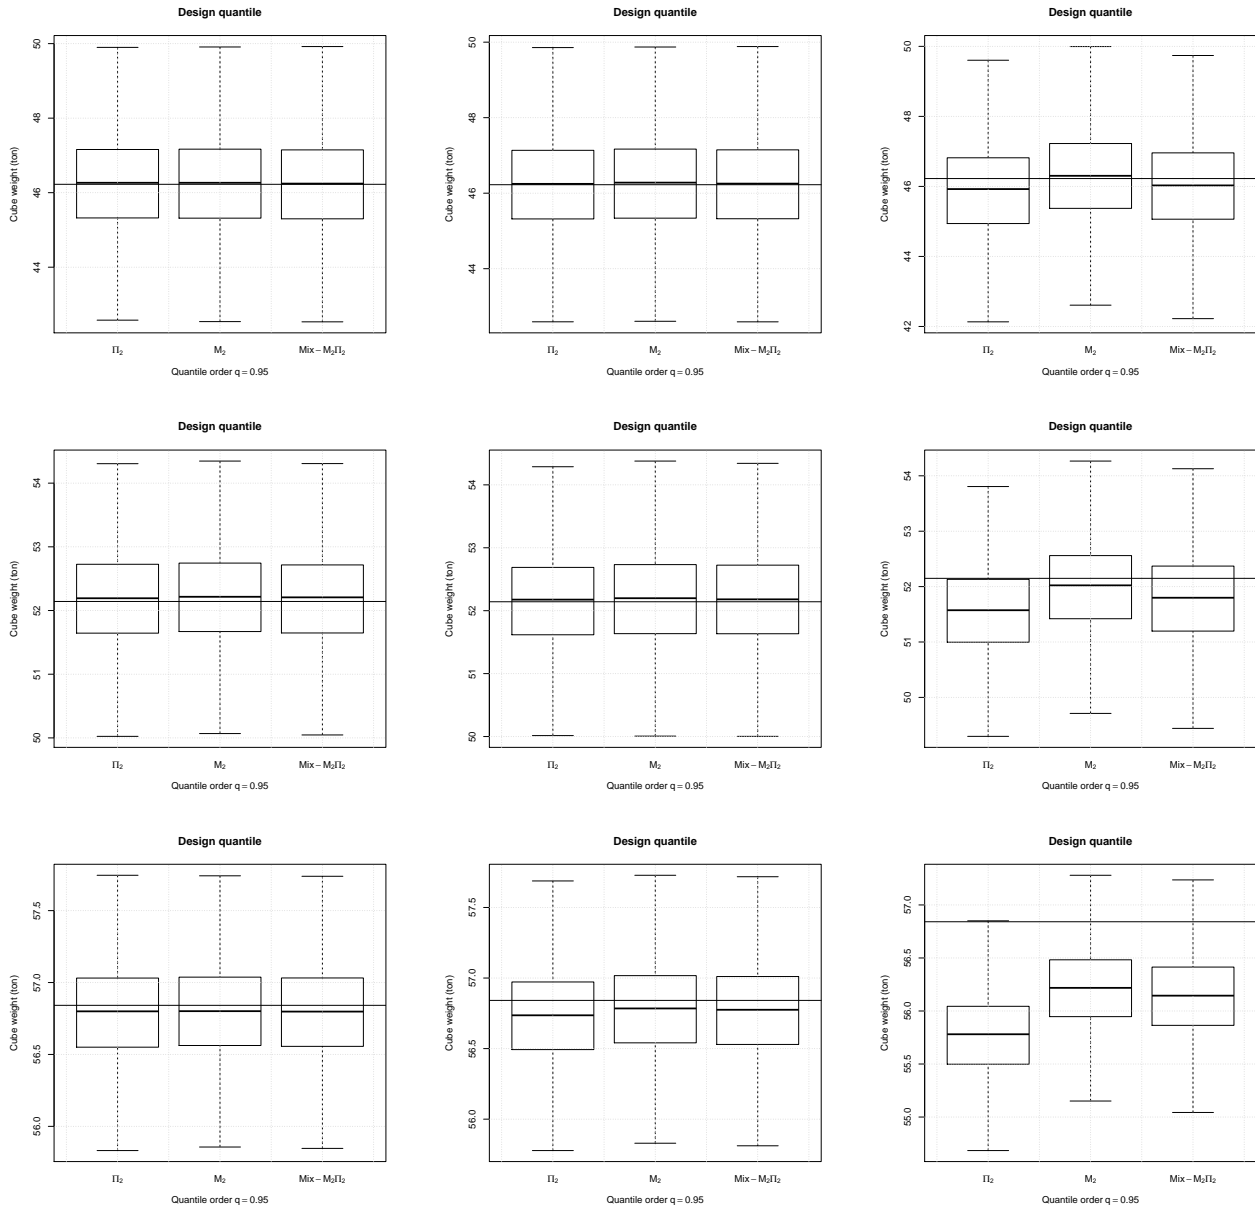

Figure 4: “Frank” case:  $N = 150$ ,  $B = 10000$ ,  $q = 0.95$ . Same as Fig. 3.

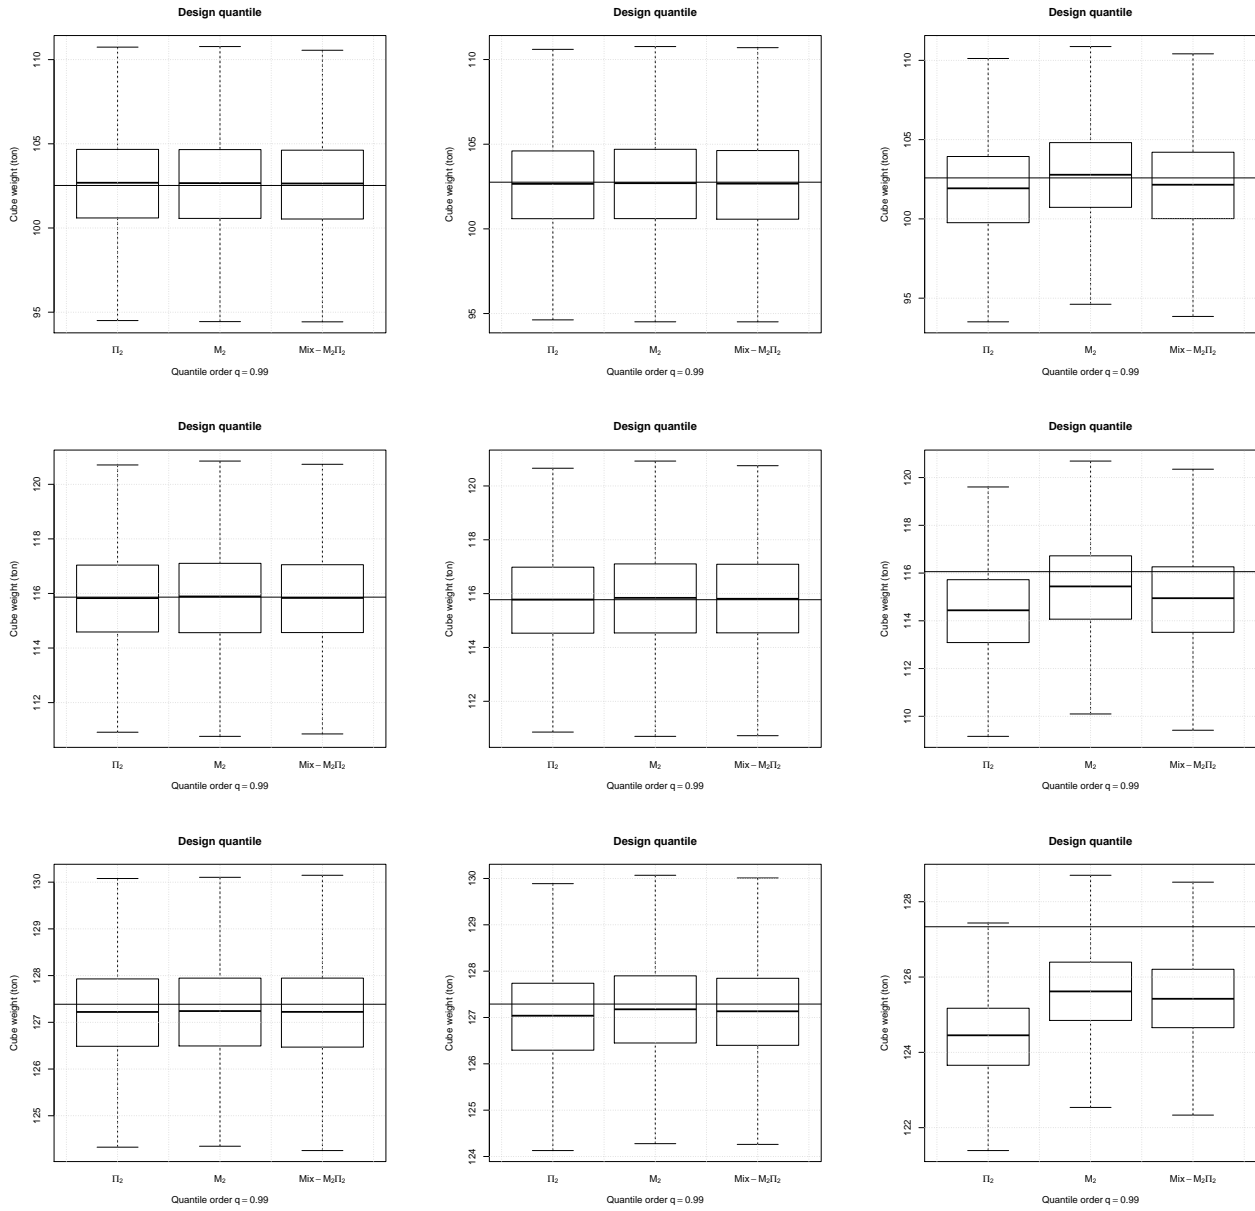

Figure 5: “Frank” case:  $N = 150, B = 10000, q = 0.99$ . Same as Fig. 3.

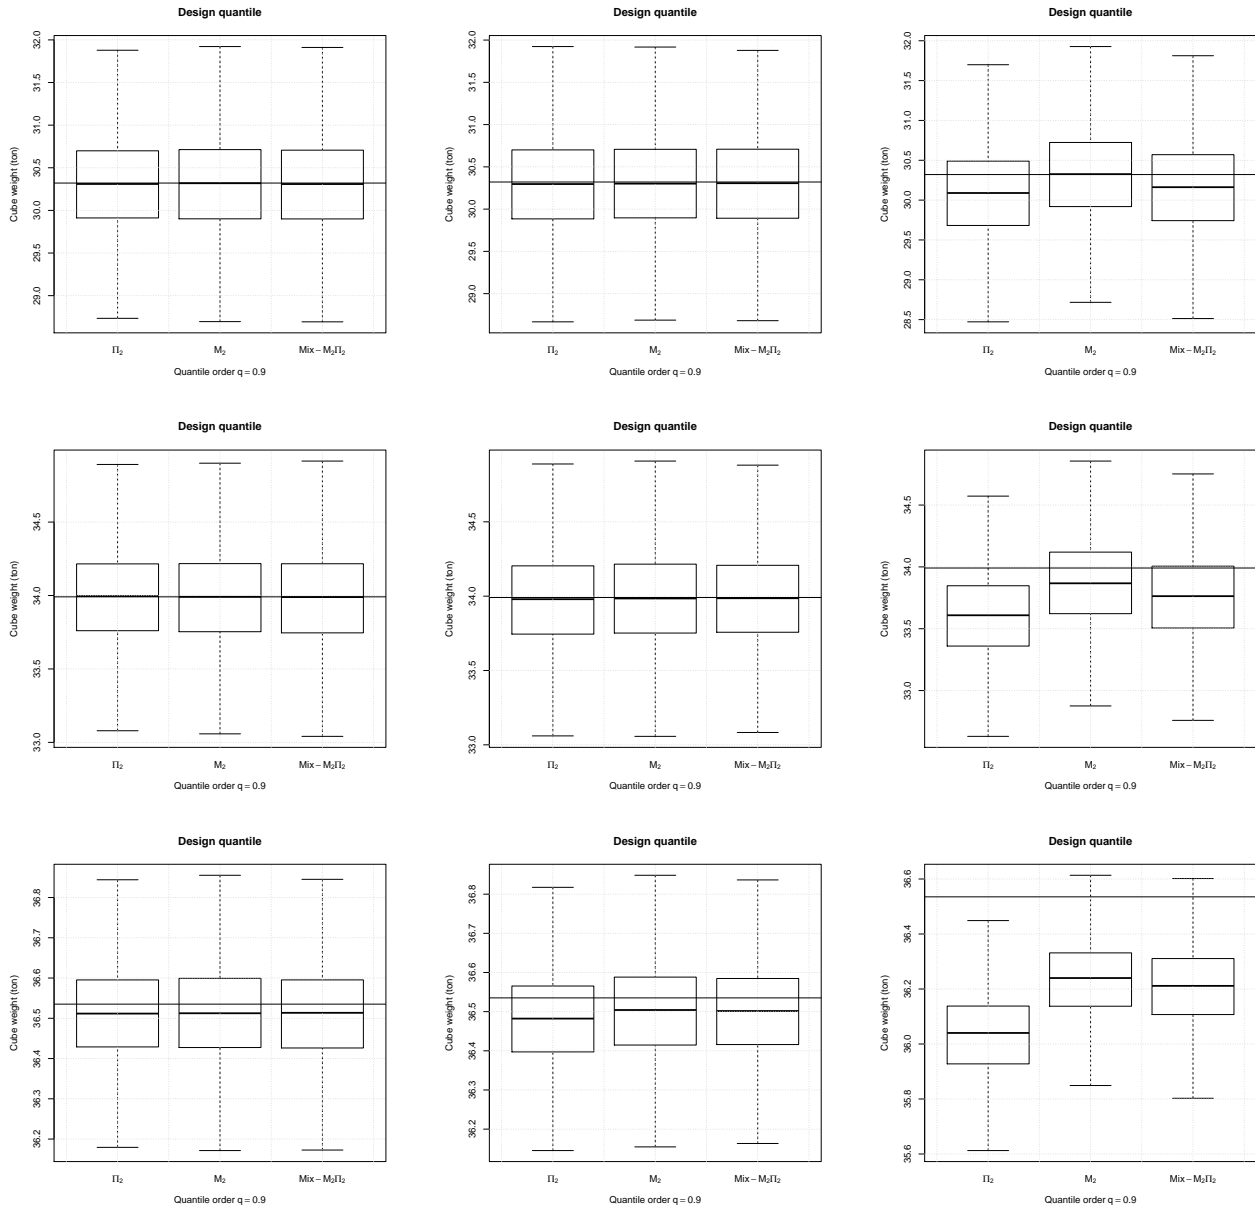

Figure 6: “Frank” case:  $N = 300$ ,  $B = 10000$ ,  $q = 0.90$ . Same as Fig. 3.

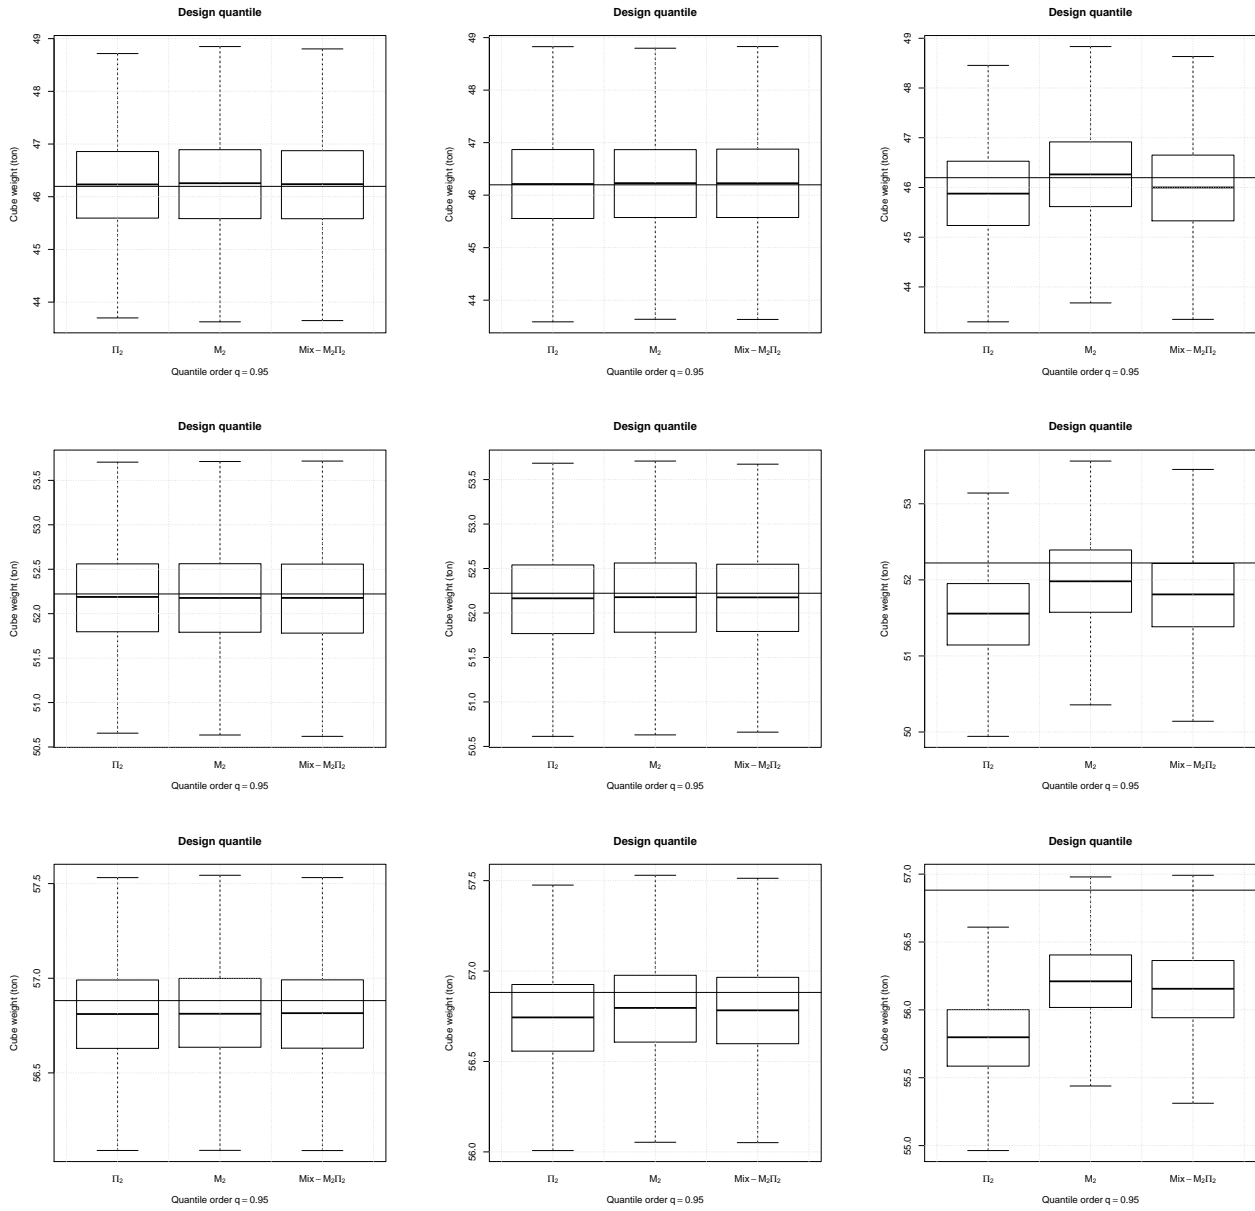

Figure 7: “Frank” case:  $N = 300, B = 10000, q = 0.95$ . Same as Fig. 4.

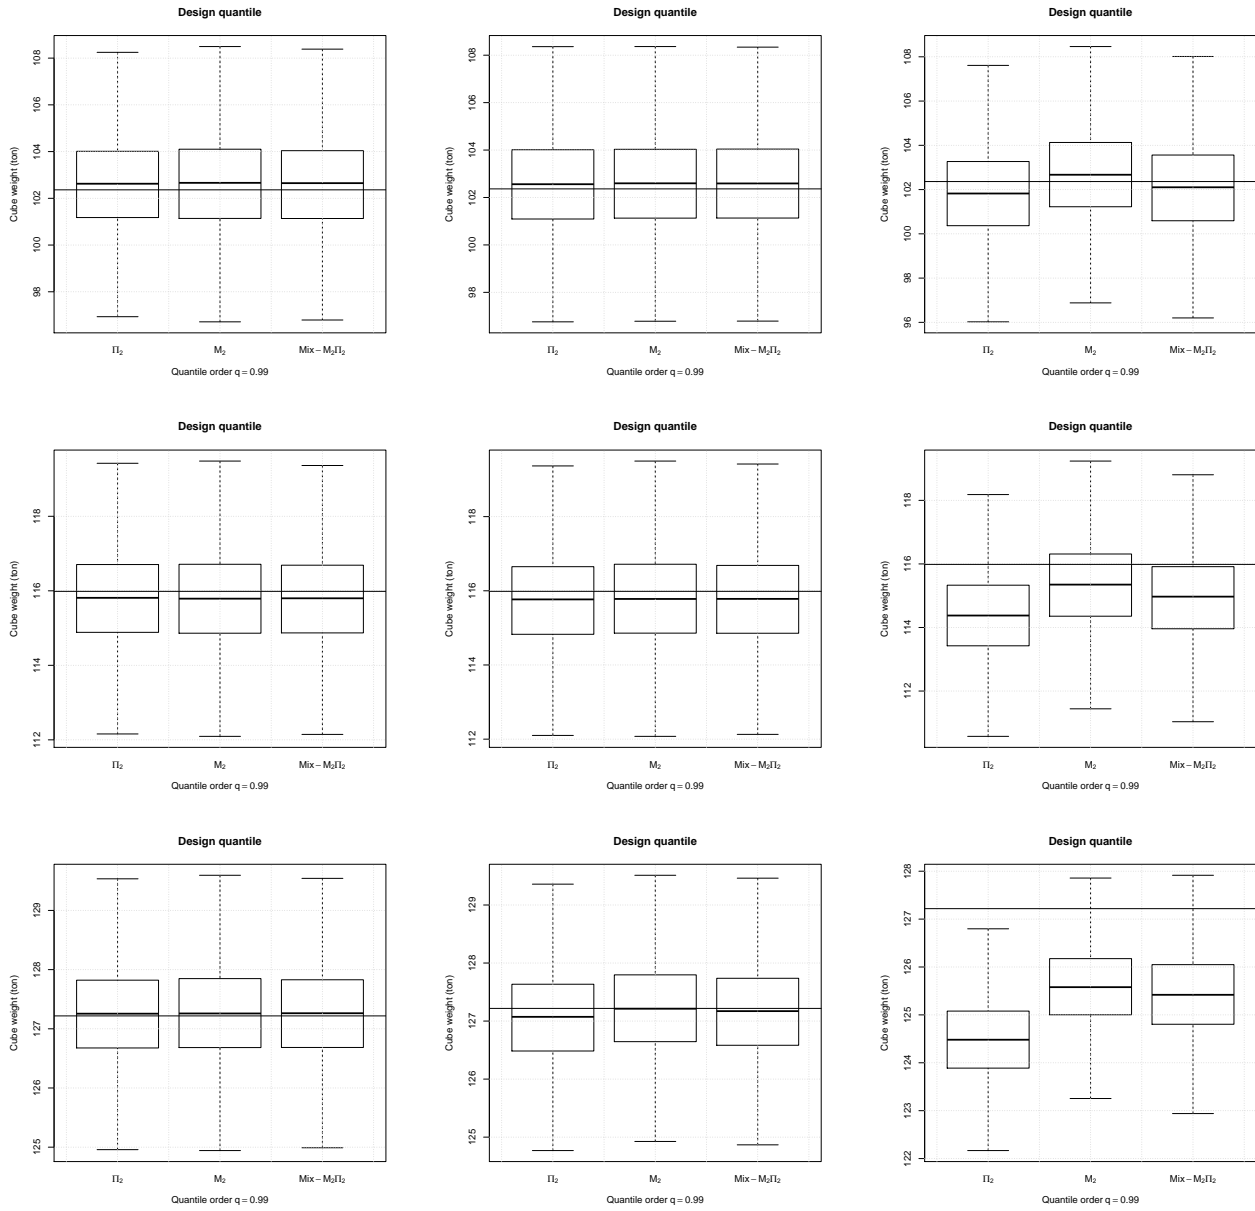

Figure 8: “Frank” case:  $N = 300, B = 10000, q = 0.99$ . Same as Fig. 5.

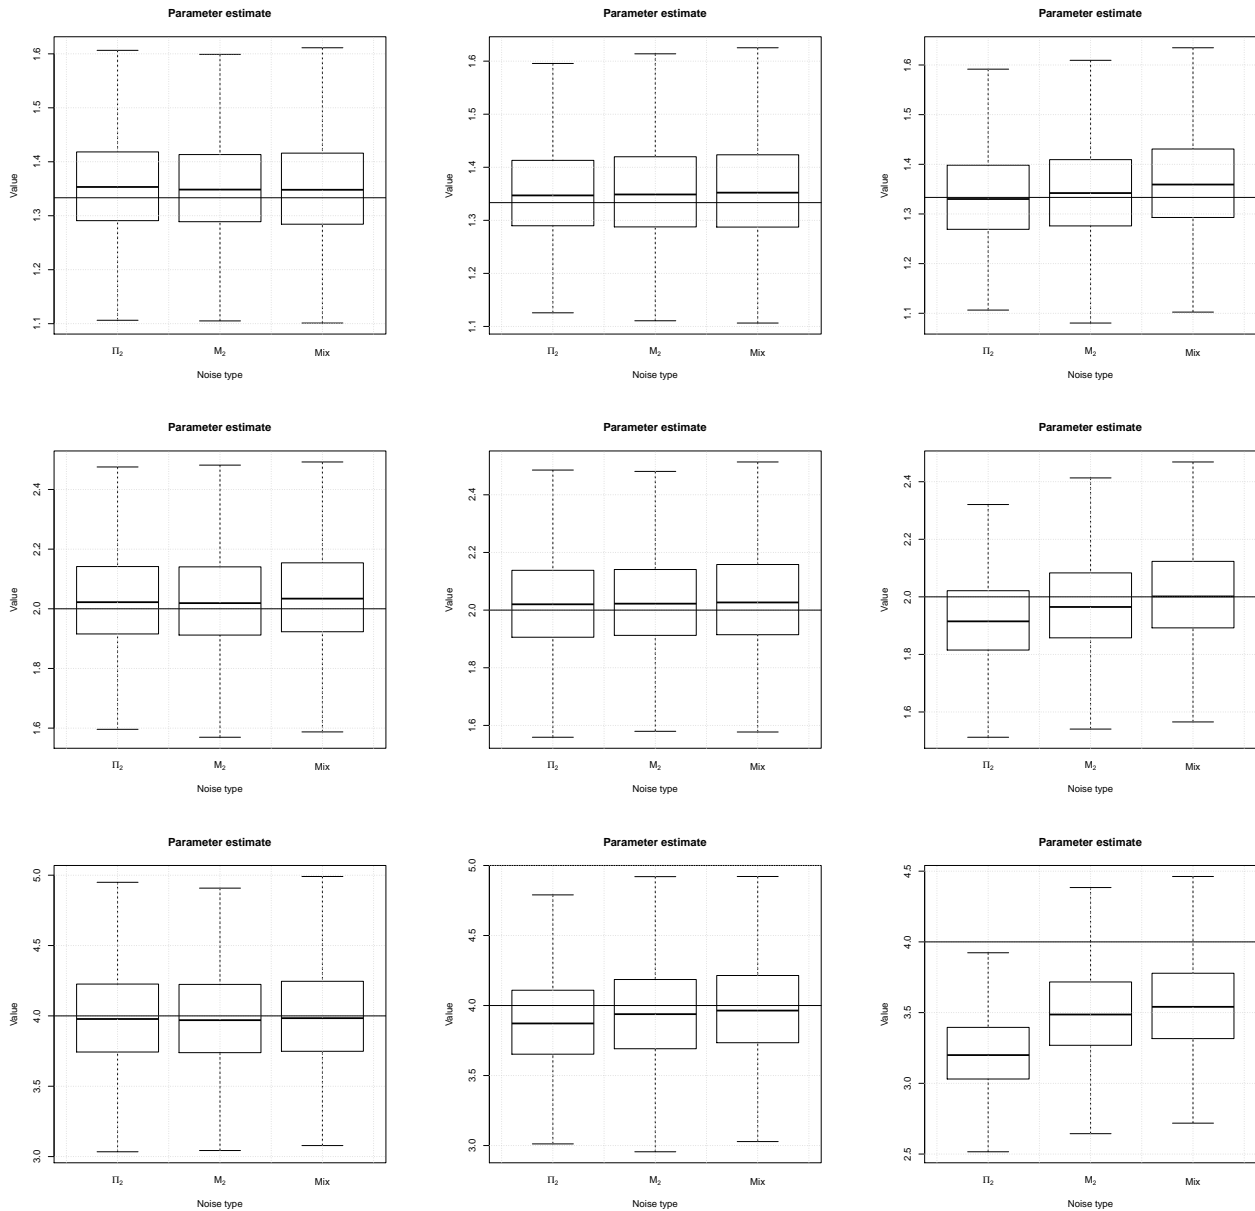

Figure 9: **“Gumbel” case:**  $N = 150$ ,  $B = 2500$ . Boxplots of the copula parameter estimates: the horizontal thick lines indicate the “true” values — see text. From top to bottom, the rows correspond, respectively, to the values of the Kendall’s  $\tau = 0.25, 0.5, 0.75$ . From left to right, the columns correspond, respectively, to the following pairs of Height and Duration resolutions:  $(\Delta_H, \Delta_D) \in \{(0.01, 0.5), (0.1, 1), (0.5, 3)\}$ . The labels “ $\Pi_2$ ”, “ $M_2$ ”, and “Mix” denote the use of an independent, a co-monotone, and a mixed randomization, respectively.



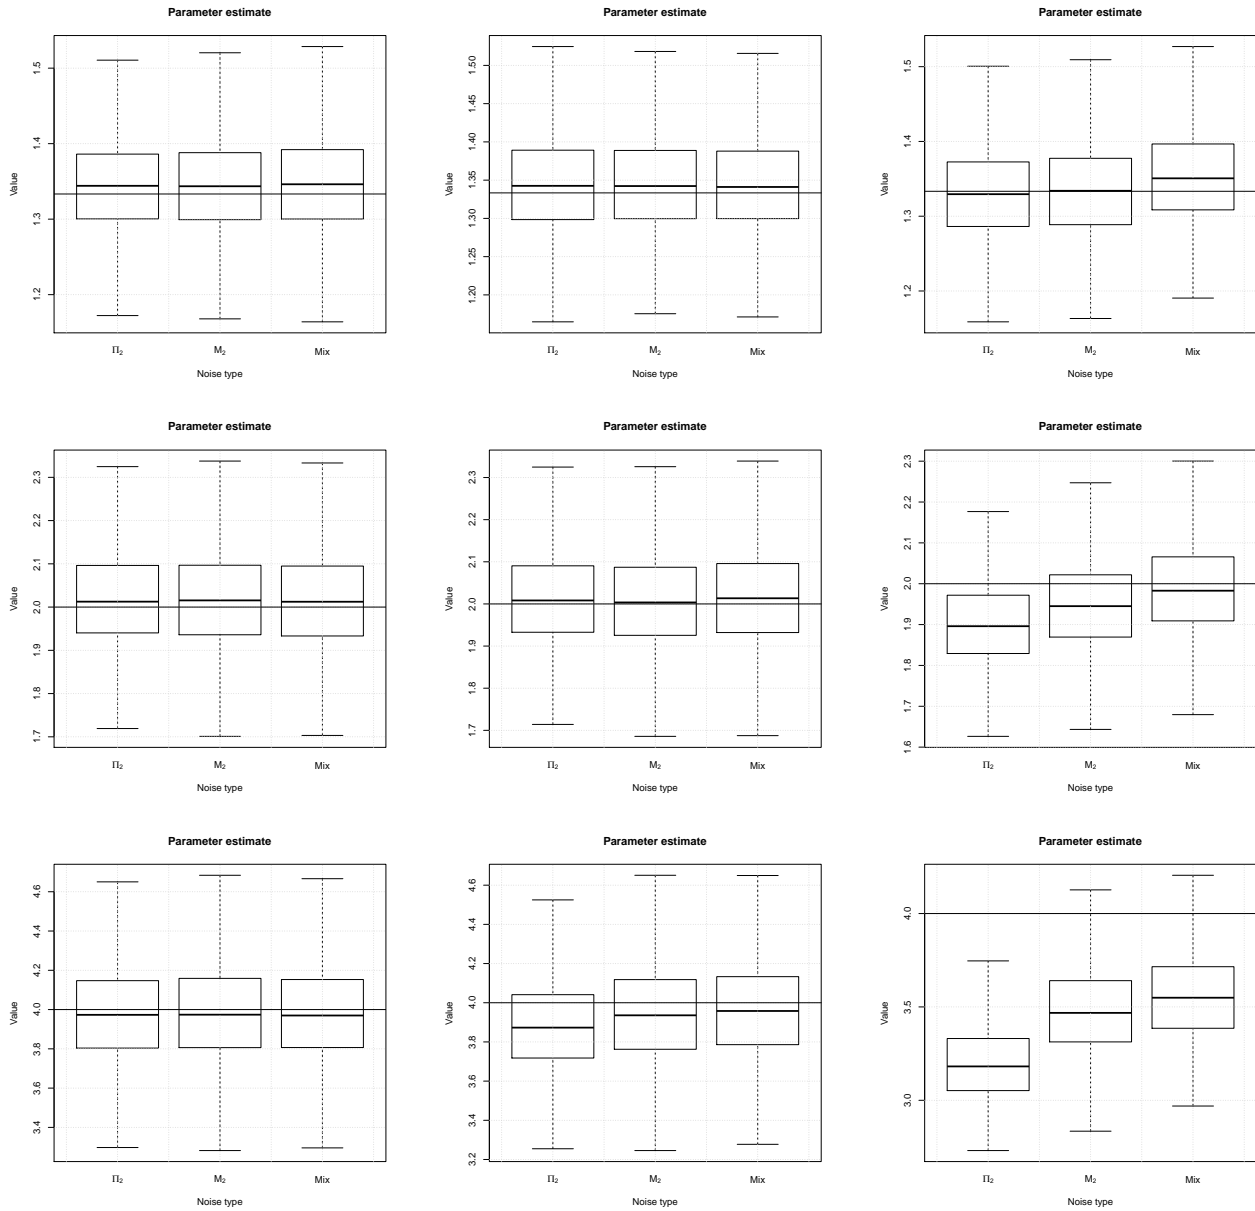

Figure 10: “Gumbel” case:  $N = 300, B = 2500$ . Same as Fig. 9.

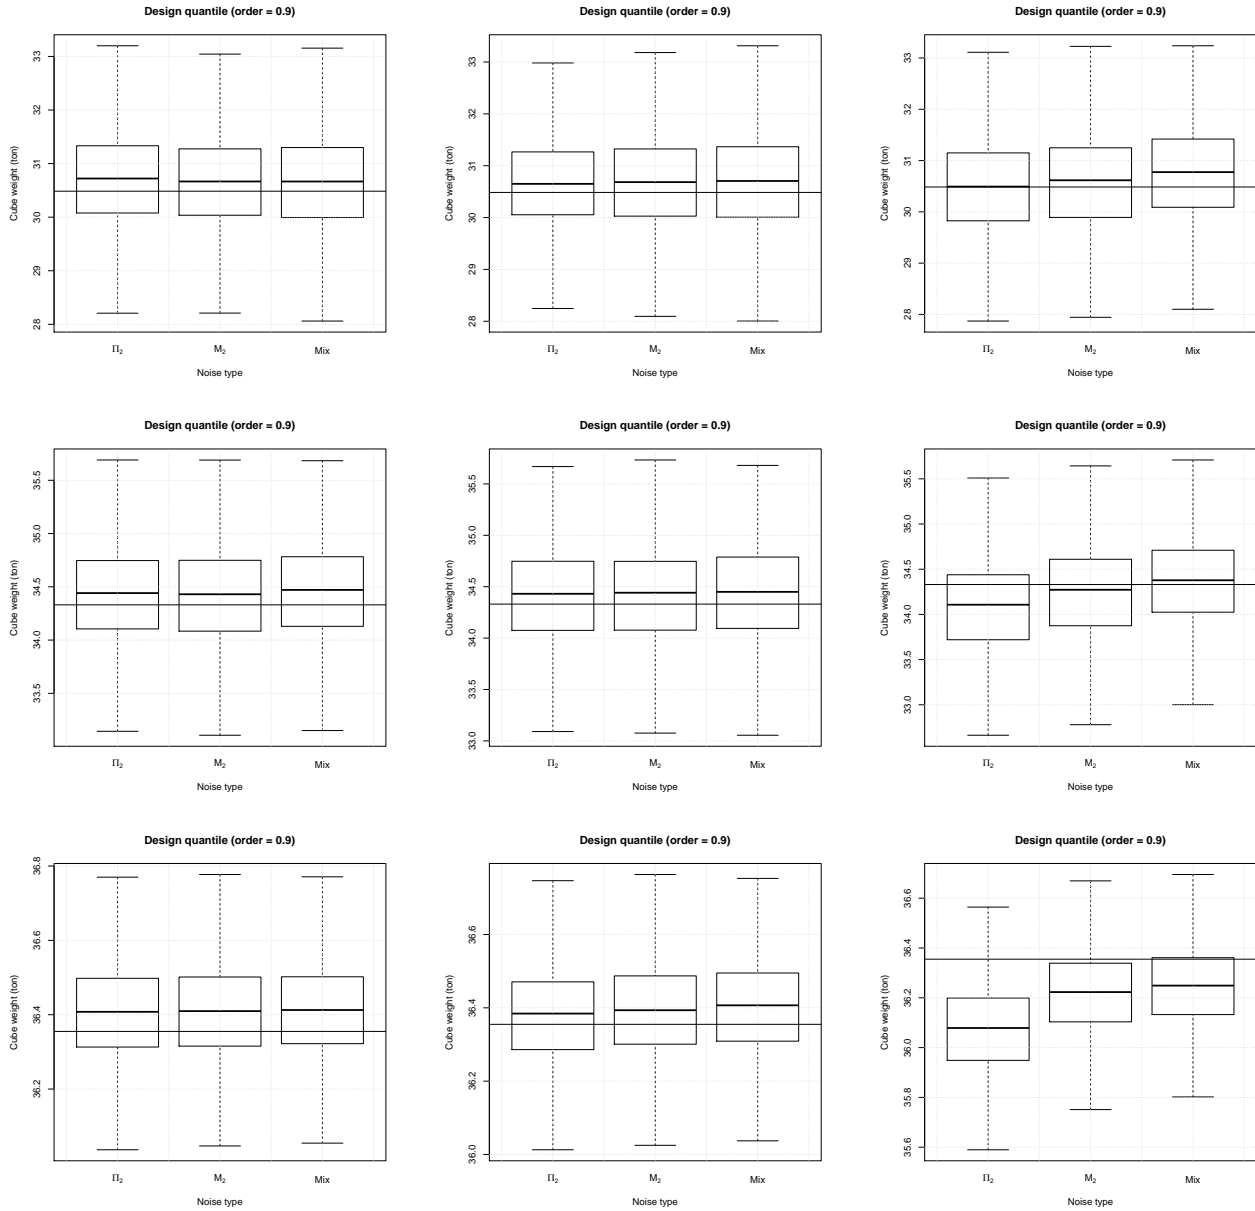

Figure 11: **“Gumbel” case:**  $N = 150$ ,  $B = 2500$ ,  $q = 0.90$ . Boxplots of the Cube Weight design quantiles estimates: the horizontal thick lines indicate the “true” values — see text. From top to bottom, the rows correspond, respectively, to the values of the Kendall’s  $\tau = 0.25, 0.5, 0.75$ . From left to right, the columns correspond, respectively, to the following pairs of height and duration resolutions:  $(\Delta_H, \Delta_D) \in \{(0.01, 0.5), (0.1, 1), (0.5, 3)\}$ . The labels “ $\Pi_2$ ”, “ $M_2$ ”, and “Mix” denote the use of an independent, a co-monotone, and a mixed randomization, respectively.

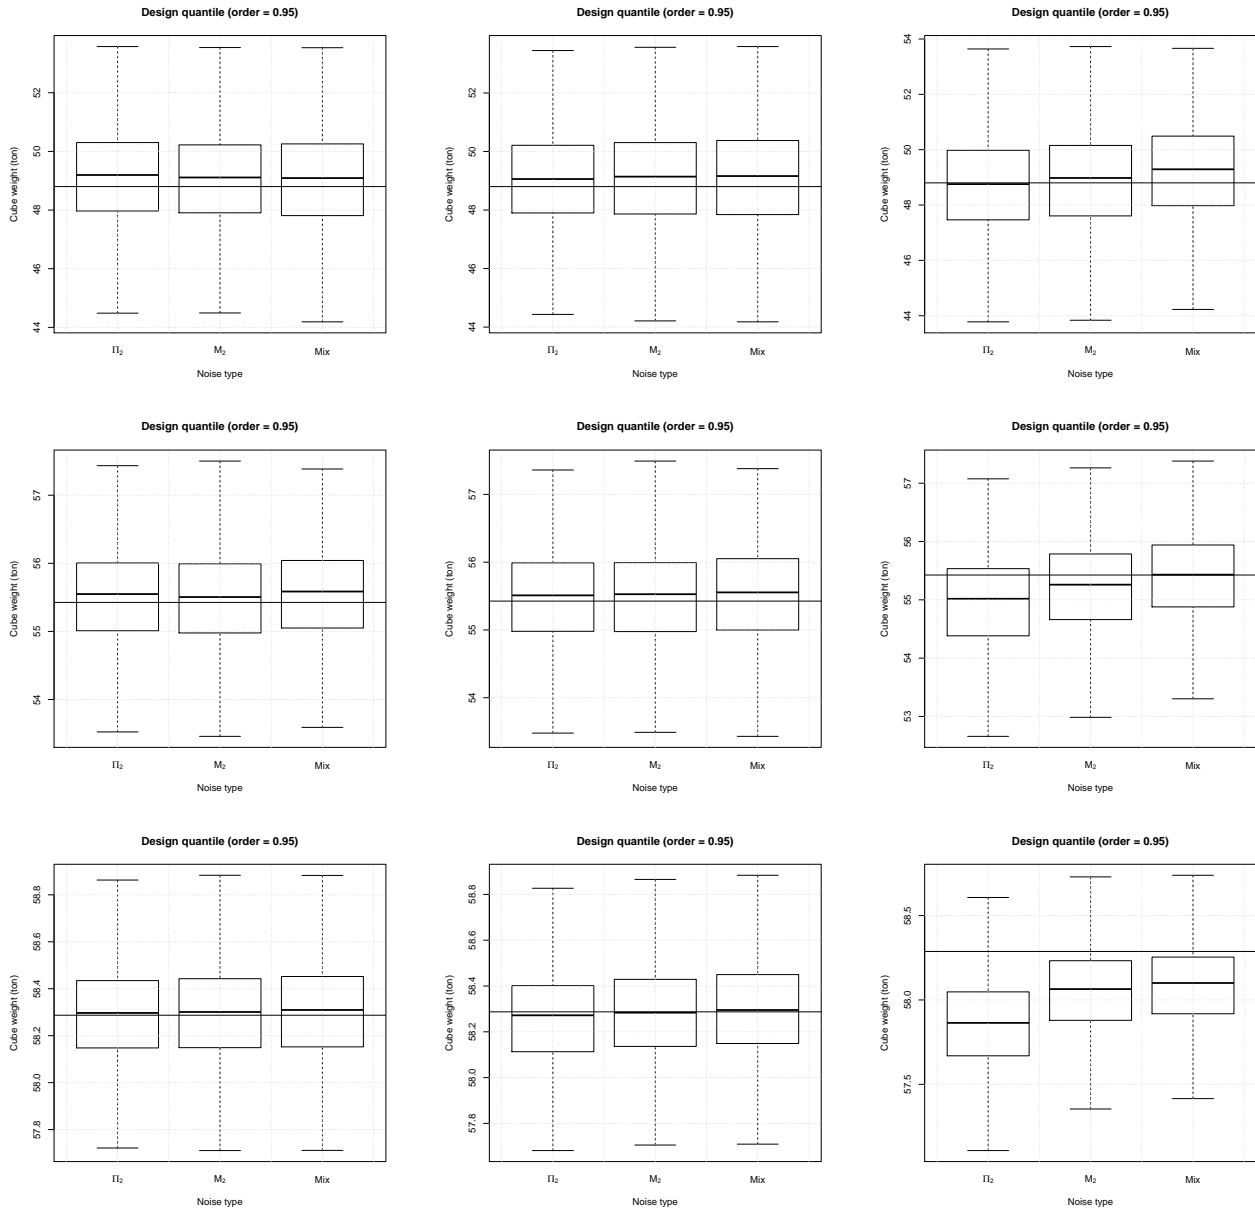

Figure 12: “Gumbel” case:  $N = 150$ ,  $B = 2500$ ,  $q = 0.95$ . Same as Fig. 11.

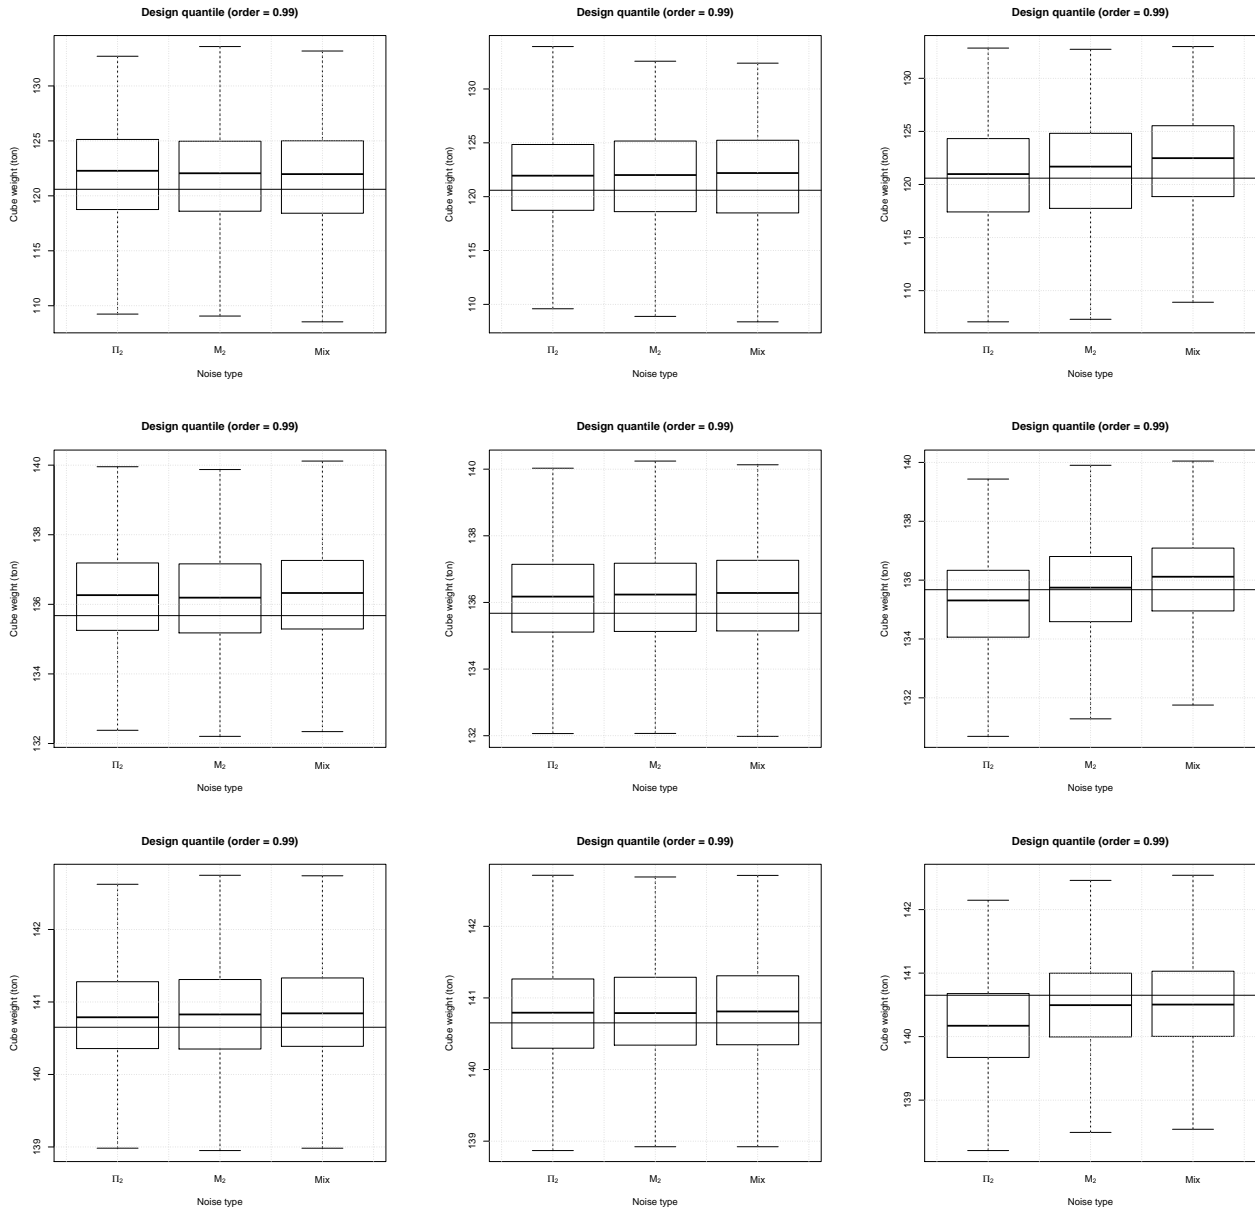

Figure 13: “Gumbel” case:  $N = 150$ ,  $B = 2500$ ,  $q = 0.99$ . Same as Fig. 11.

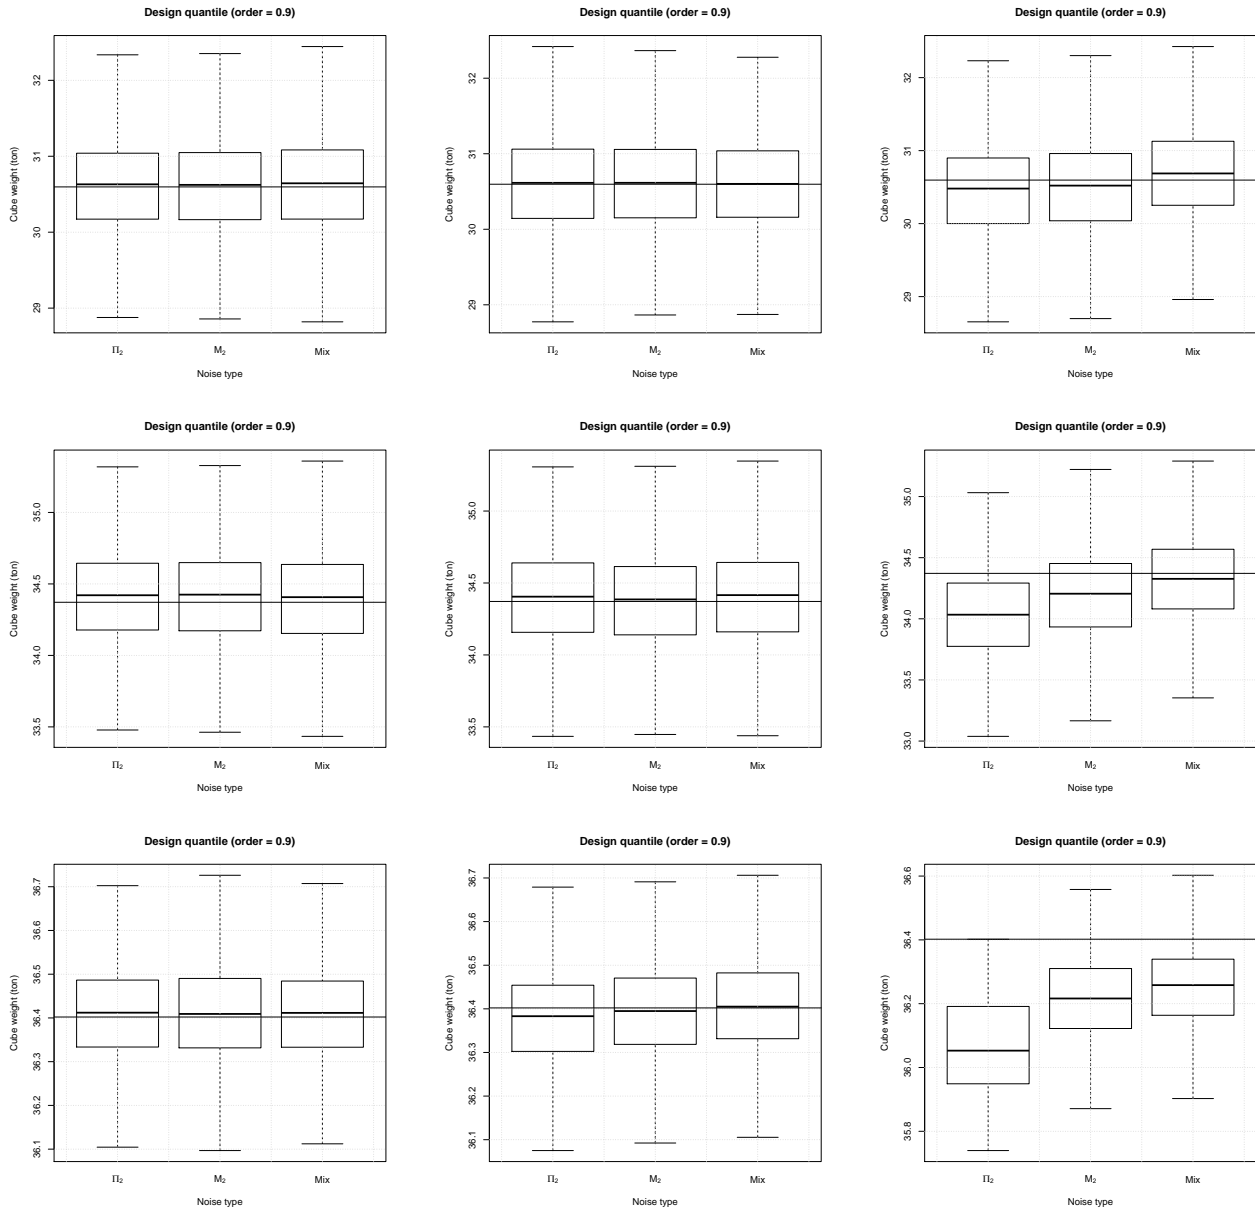

Figure 14: “Gumbel” case:  $N = 300$ ,  $B = 2500$ ,  $q = 0.90$ . Same as Fig. 11.

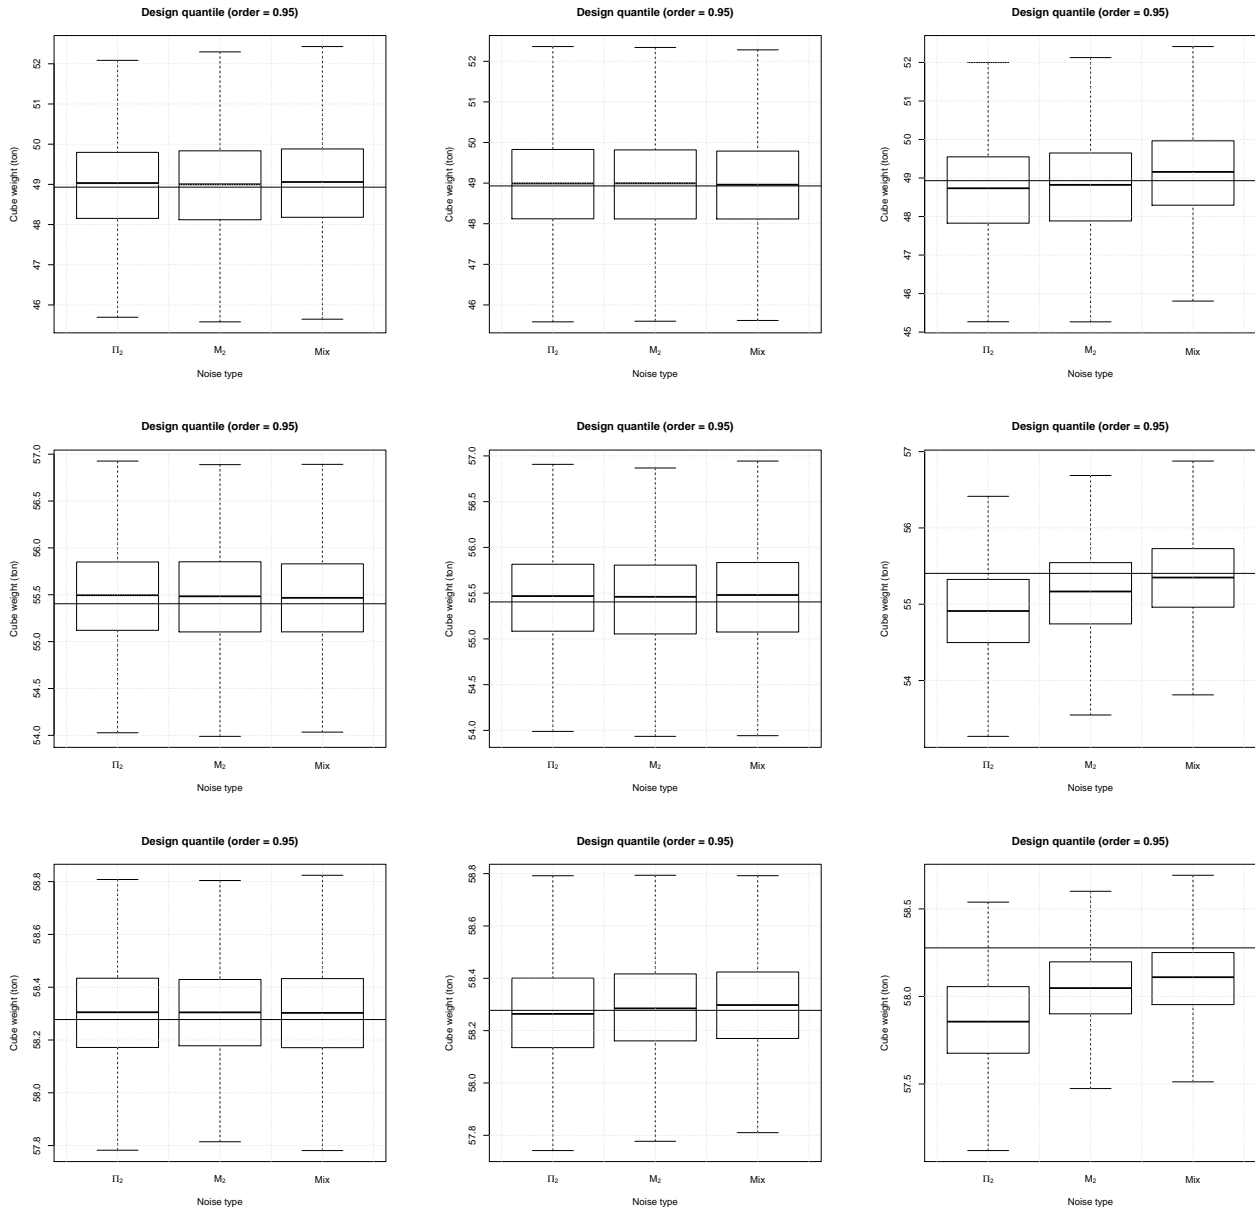

Figure 15: “Gumbel” case:  $N = 300$ ,  $B = 2500$ ,  $q = 0.95$ . Same as Fig. 12.

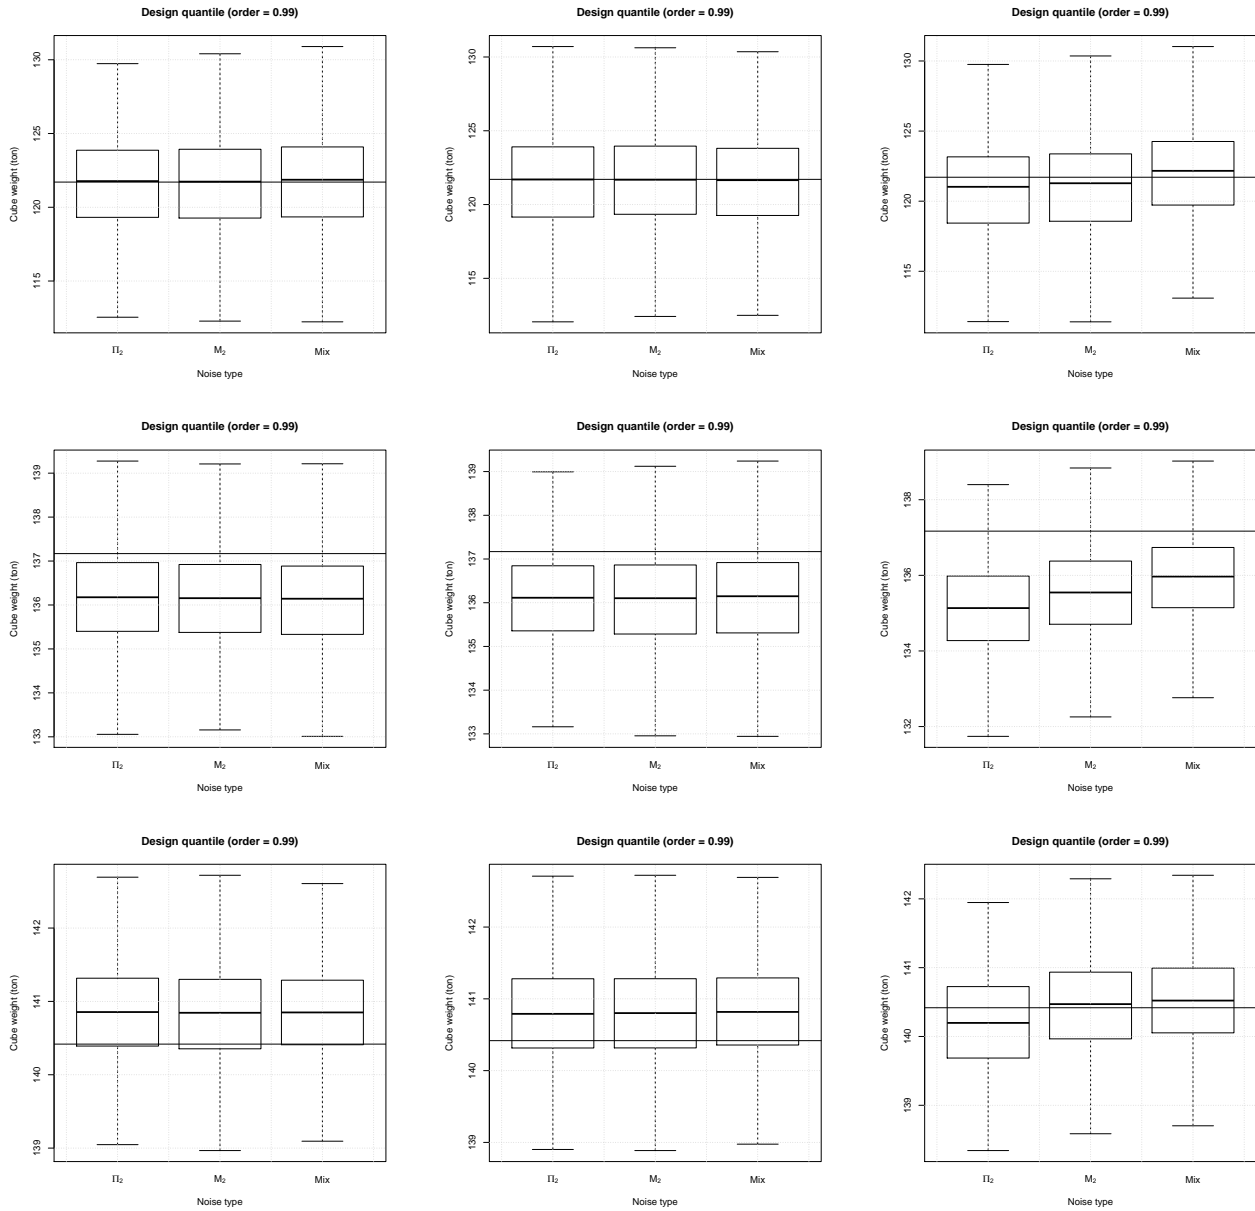

Figure 16: “Gumbel” case:  $N = 300$ ,  $B = 2500$ ,  $q = 0.99$ . Same as Fig. 13.

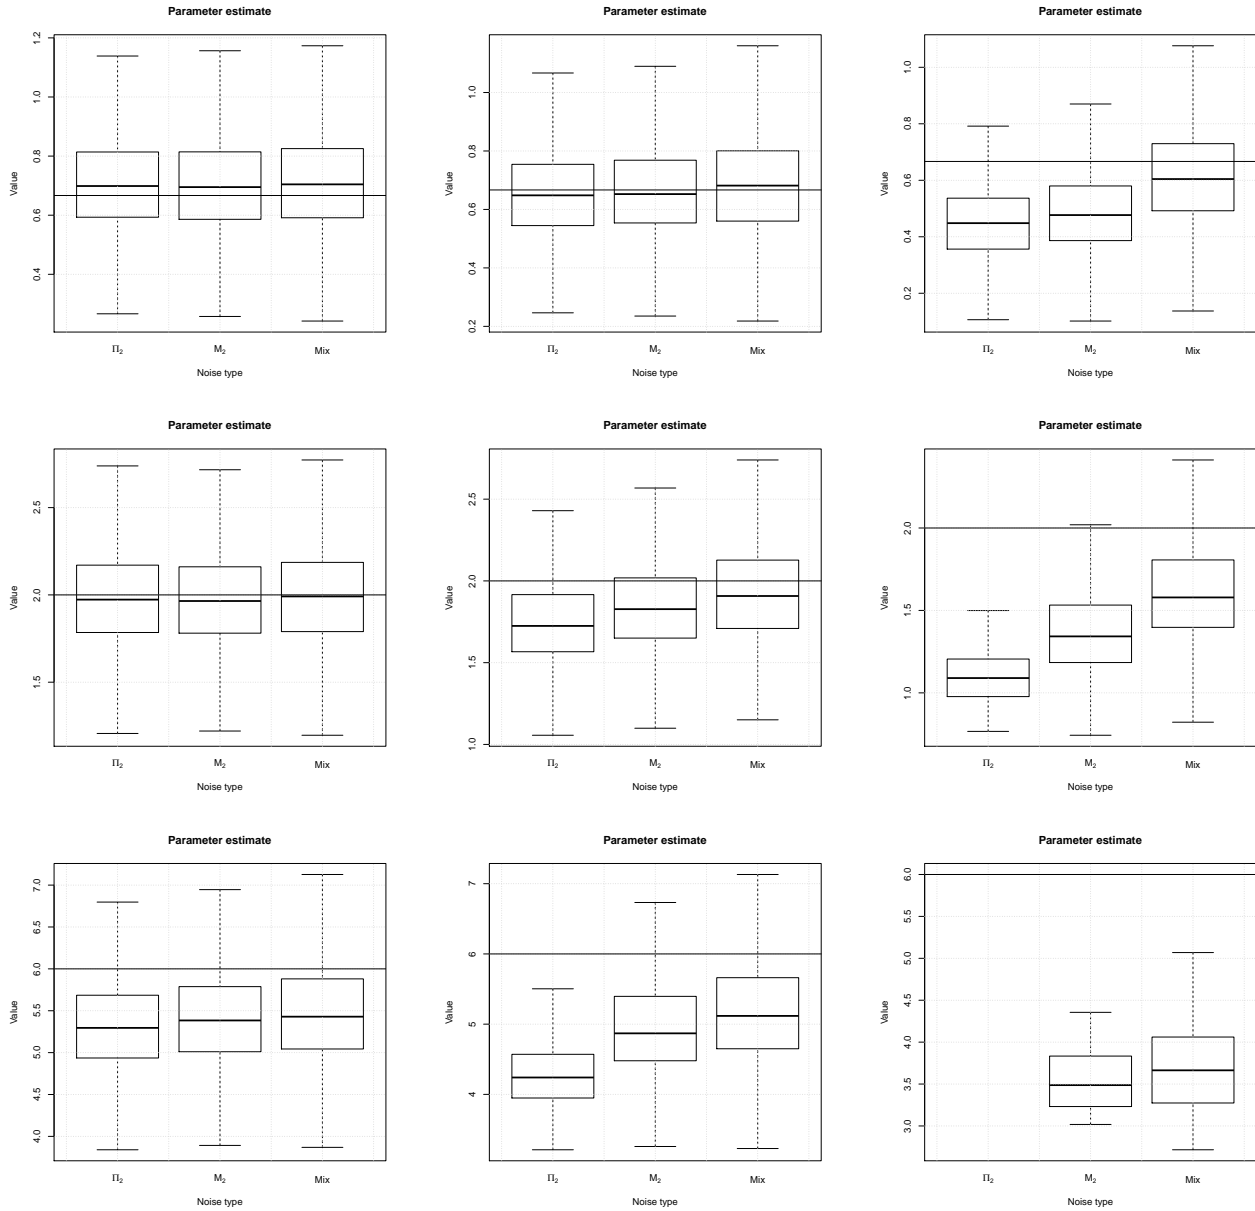

Figure 17: **“Clayton” case:**  $N = 150$ ,  $B = 2500$ . Boxplots of the copula parameter estimates: the horizontal thick lines indicate the “true” values — see text. From top to bottom, the rows correspond, respectively, to the values of the Kendall’s  $\tau = 0.25, 0.5, 0.75$ . From left to right, the columns correspond, respectively, to the following pairs of Height and Duration resolutions:  $(\Delta_H, \Delta_D) \in \{(0.01, 0.5), (0.1, 1), (0.5, 3)\}$ . The labels “ $\Pi_2$ ”, “ $M_2$ ”, and “Mix” denote the use of an independent, a co-monotone, and a mixed randomization, respectively.



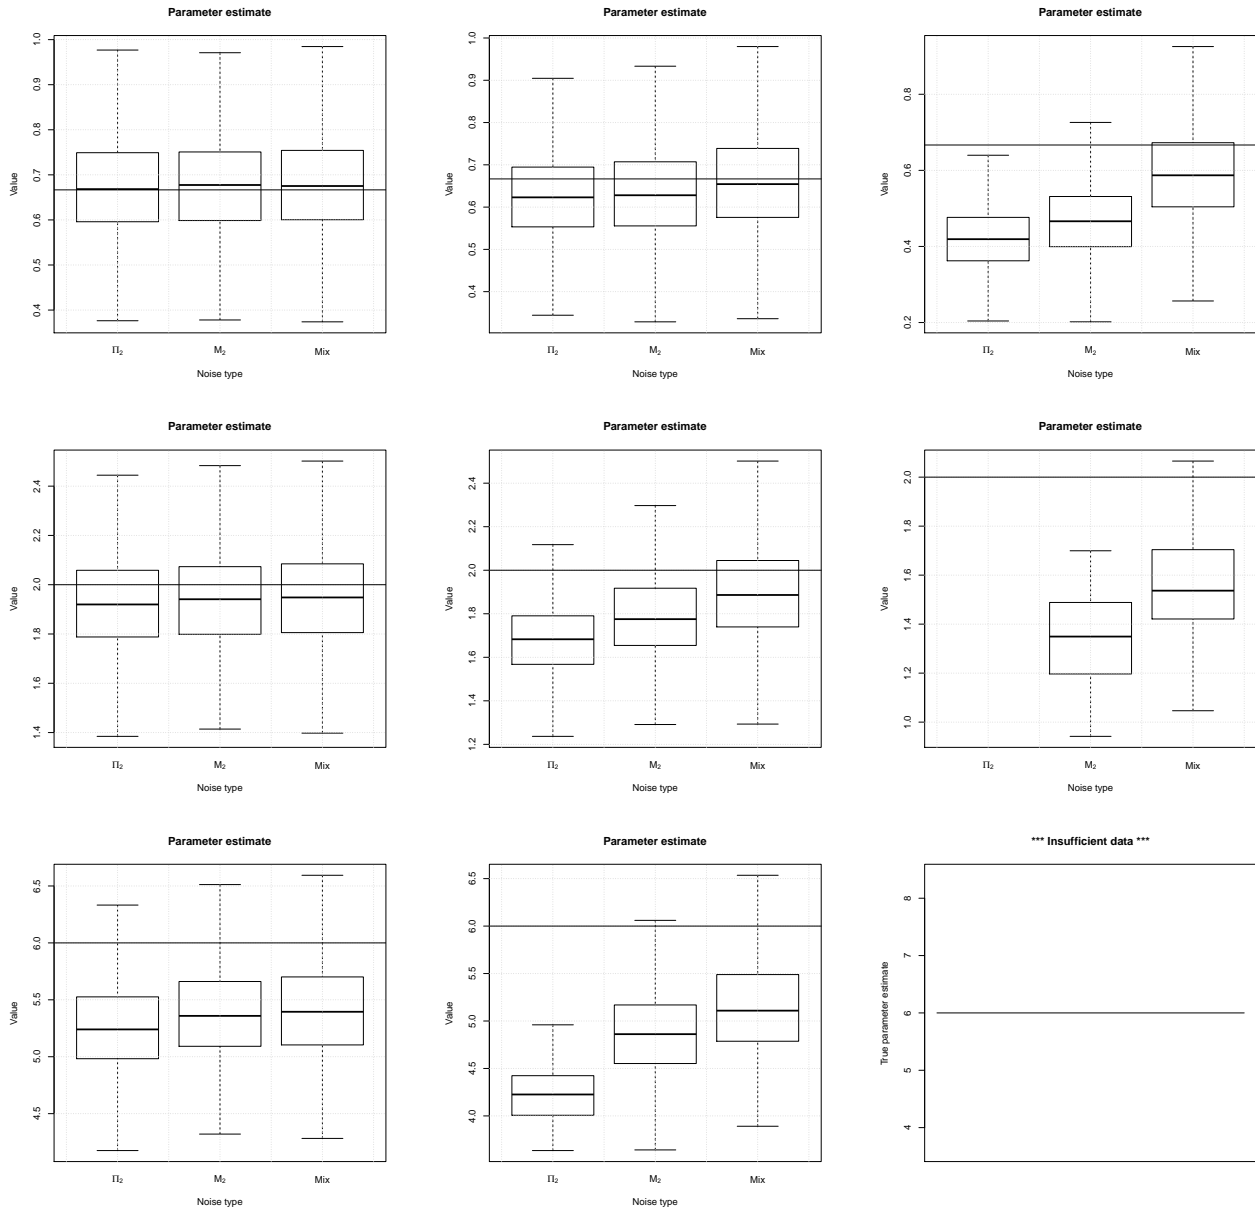

Figure 18: “Clayton” case:  $N = 300$ ,  $B = 2500$ . Same as Fig. 17.

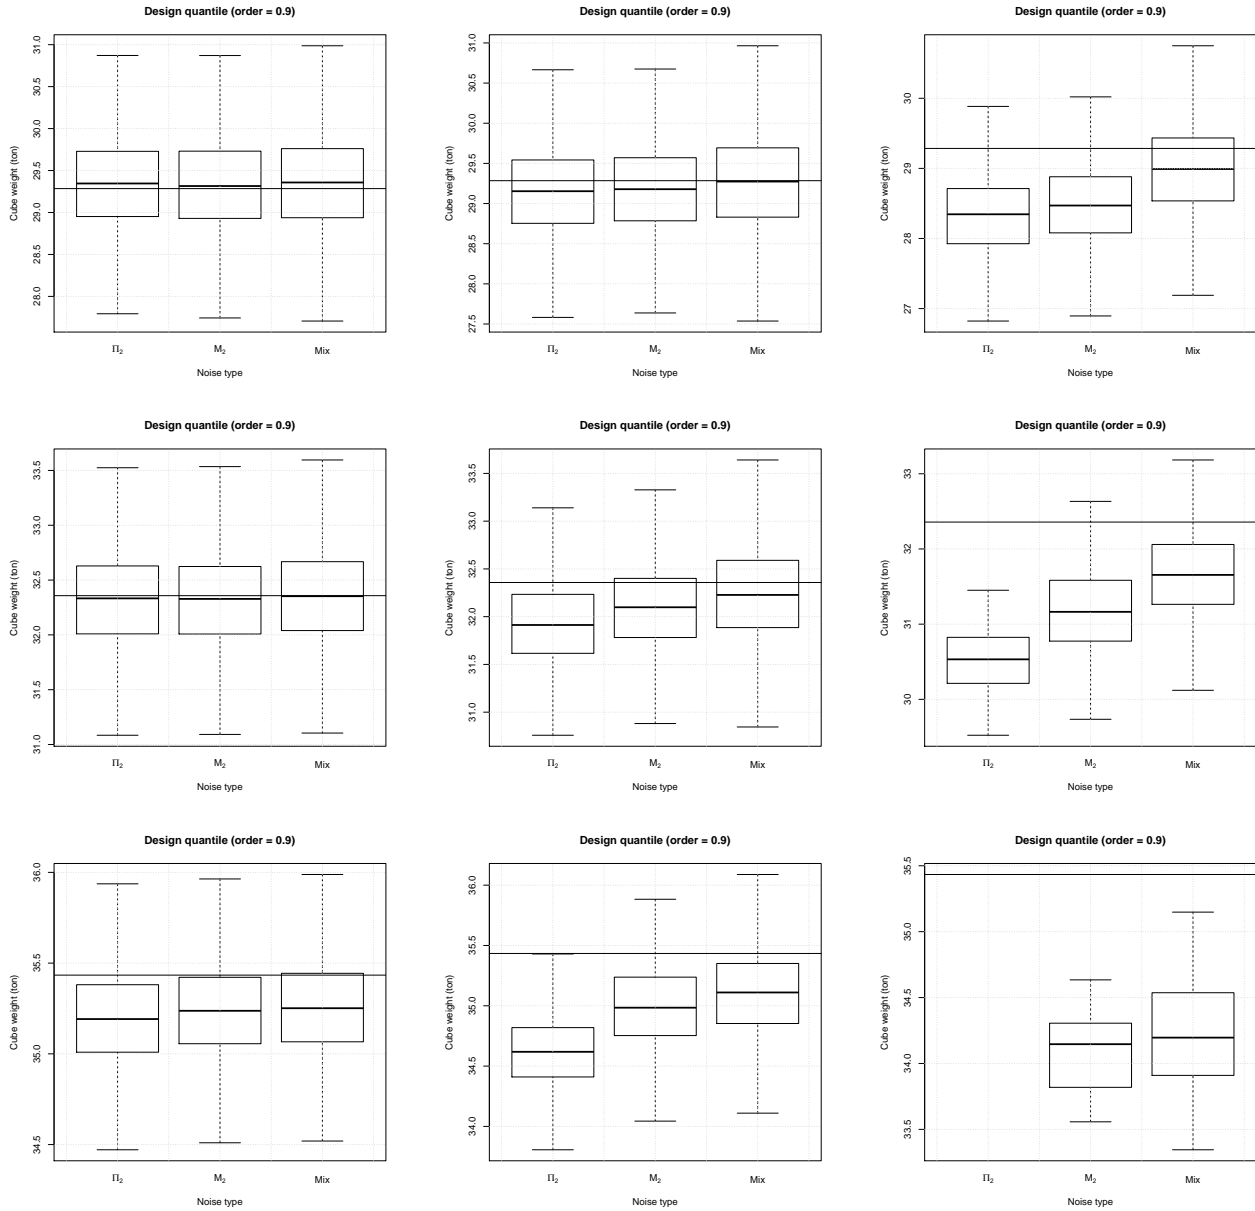

Figure 19: **“Clayton” case:**  $N = 150$ ,  $B = 2500$ ,  $q = 0.90$ . Boxplots of the Cube Weight design quantiles estimates: the horizontal thick lines indicate the “true” values — see text. From top to bottom, the rows correspond, respectively, to the values of the Kendall’s  $\tau = 0.25, 0.5, 0.75$ . From left to right, the columns correspond, respectively, to the following pairs of height and duration resolutions:  $(\Delta_H, \Delta_D) \in \{(0.01, 0.5), (0.1, 1), (0.5, 3)\}$ . The labels “ $\Pi_2$ ”, “ $M_2$ ”, and “Mix” denote the use of an independent, a co-monotone, and a mixed randomization, respectively.

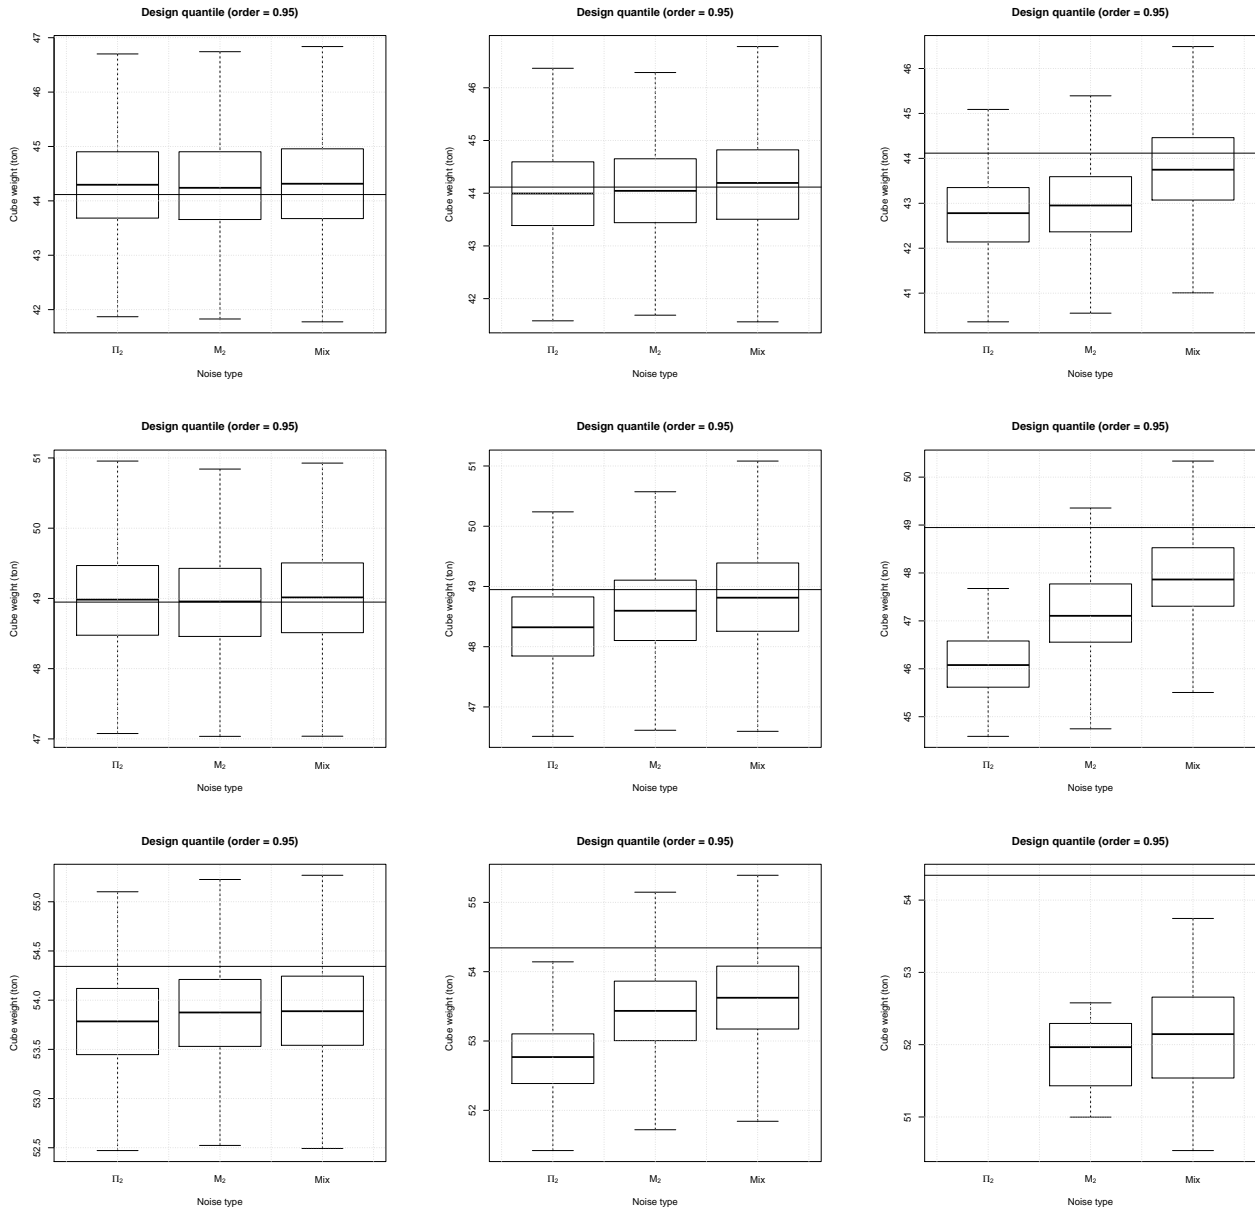

Figure 20: “Clayton” case:  $N = 150$ ,  $B = 2500$ ,  $q = 0.95$ . Same as Fig. 19.

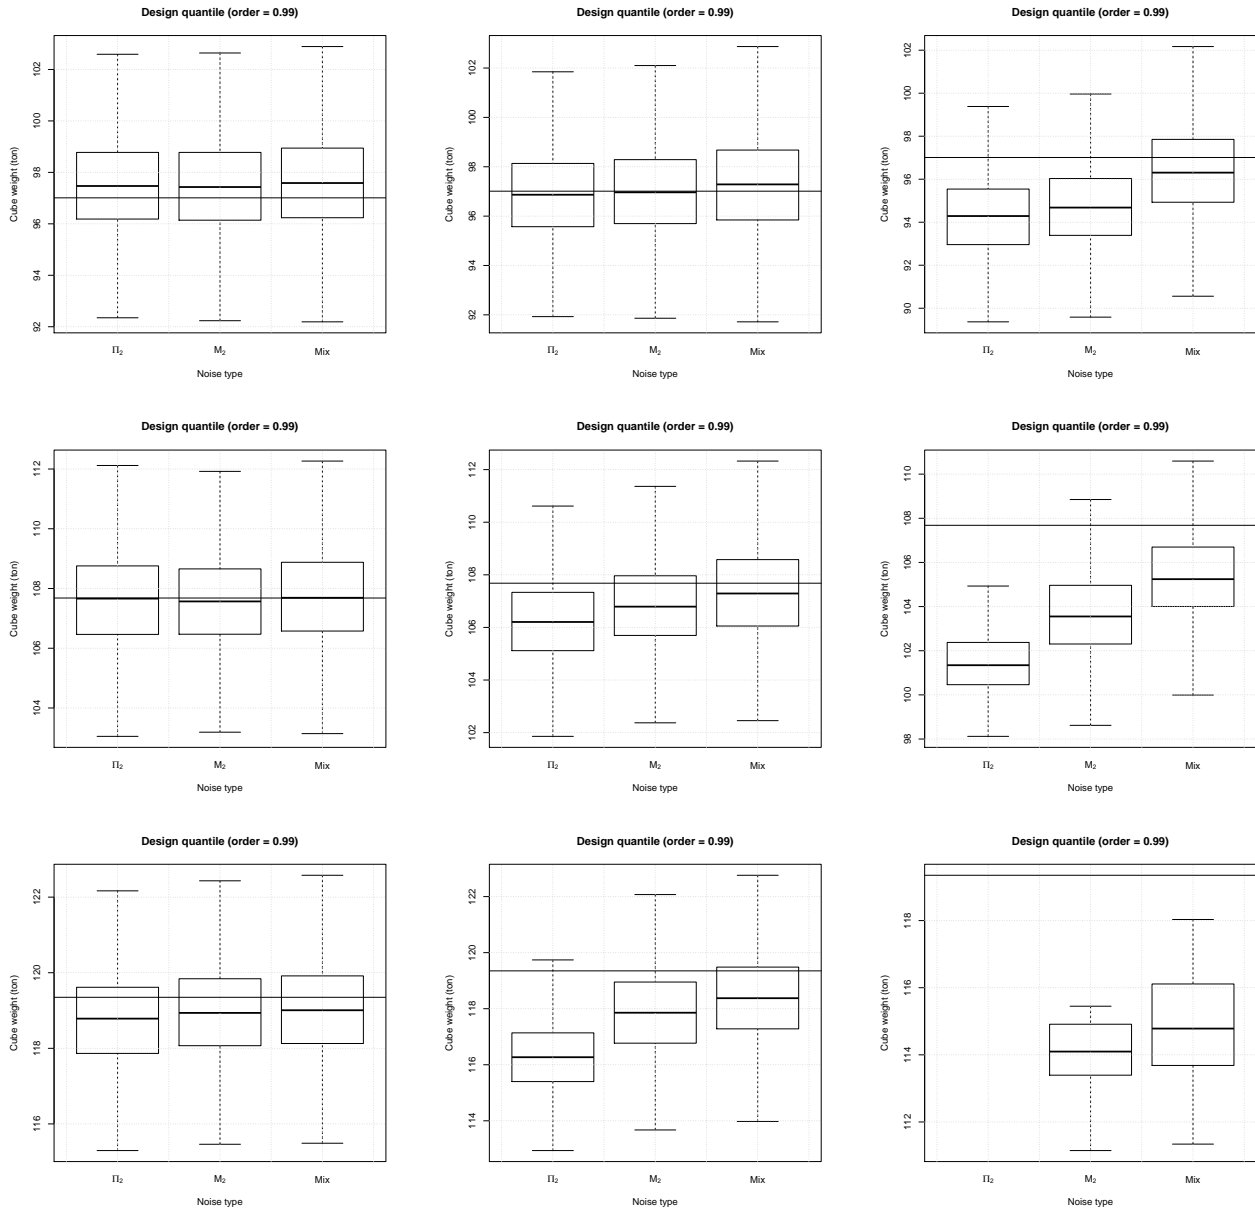

Figure 21: “Clayton” case:  $N = 150$ ,  $B = 2500$ ,  $q = 0.99$ . Same as Fig. 19.

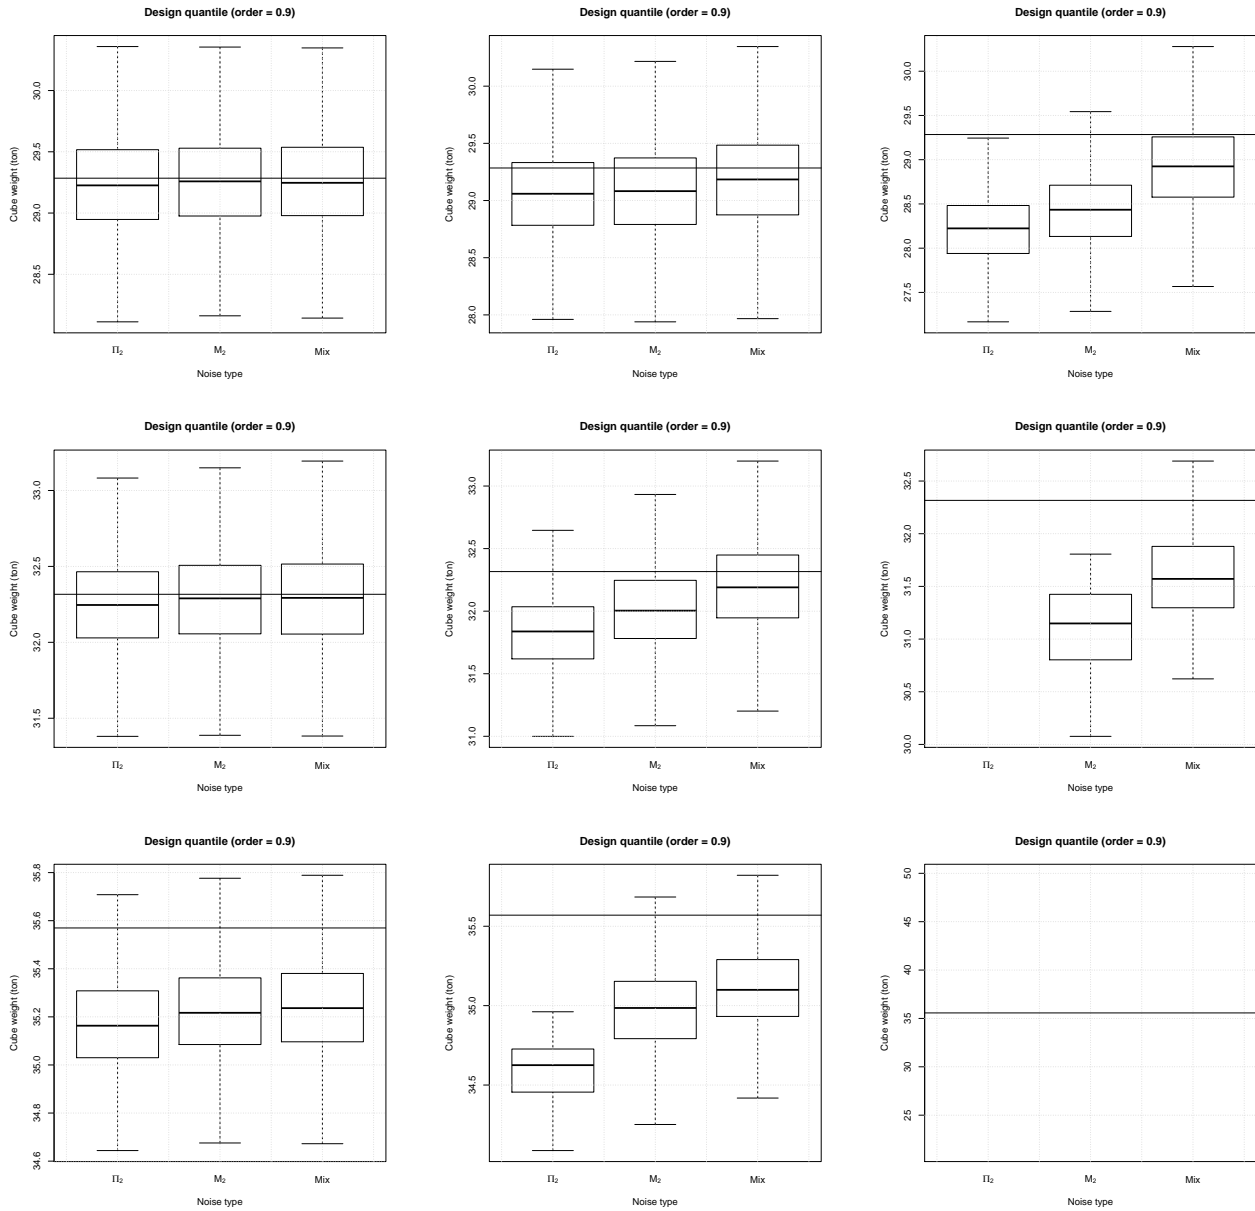

Figure 22: “Clayton” case:  $N = 300$ ,  $B = 2500$ ,  $q = 0.90$ . Same as Fig. 19.

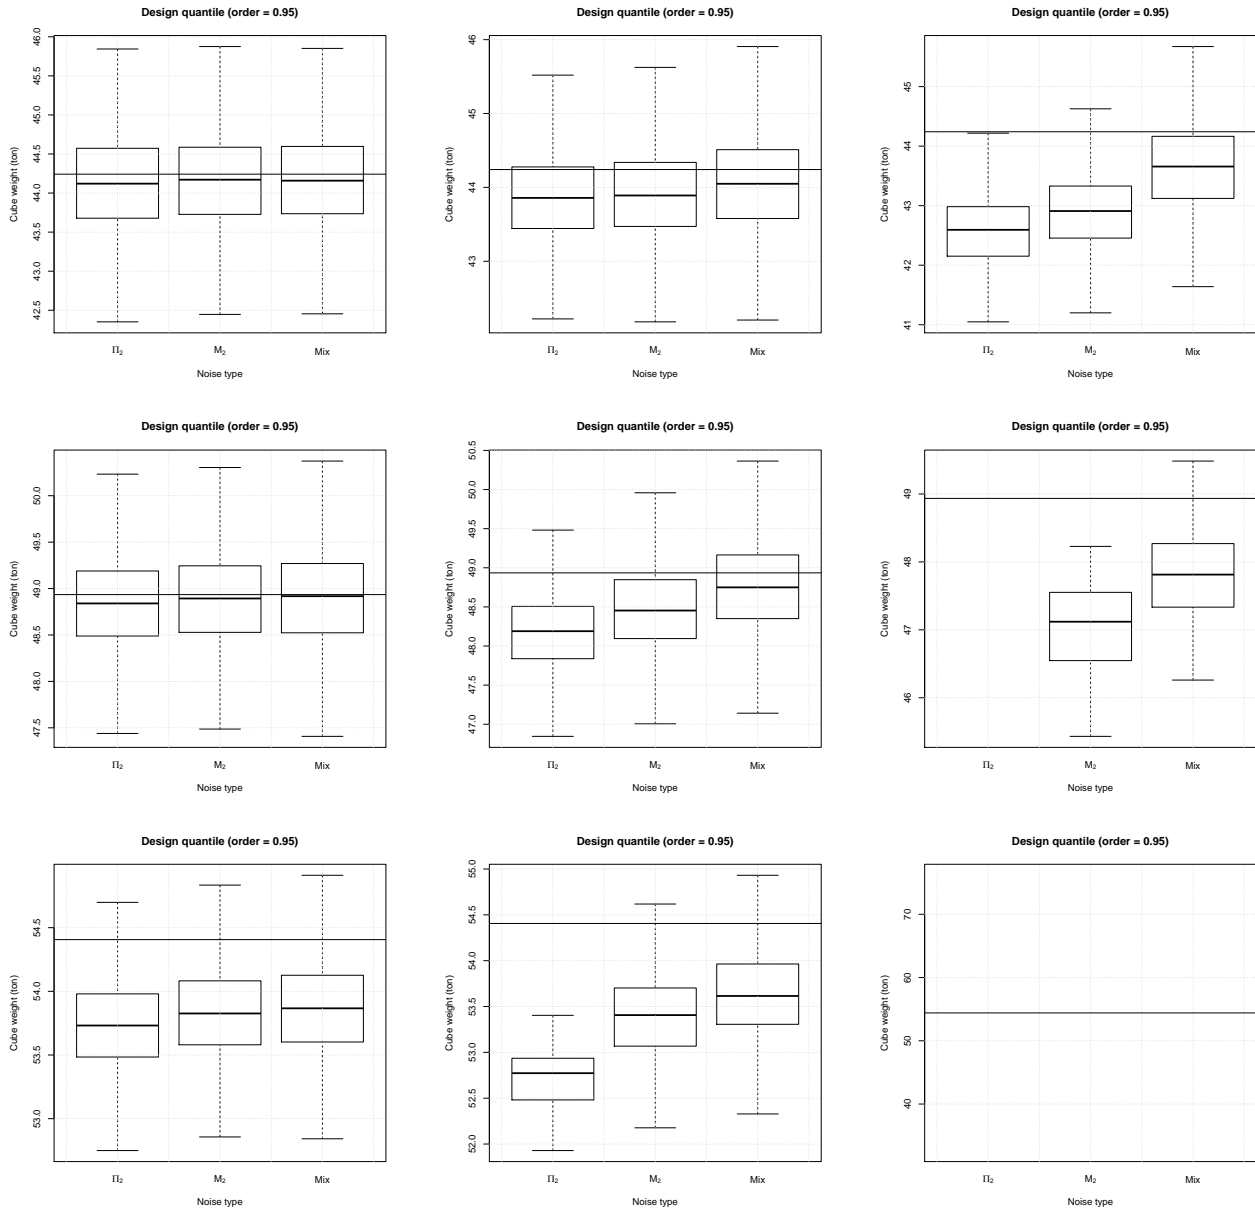

Figure 23: “Clayton” case:  $N = 300$ ,  $B = 2500$ ,  $q = 0.95$ . Same as Fig. 20.

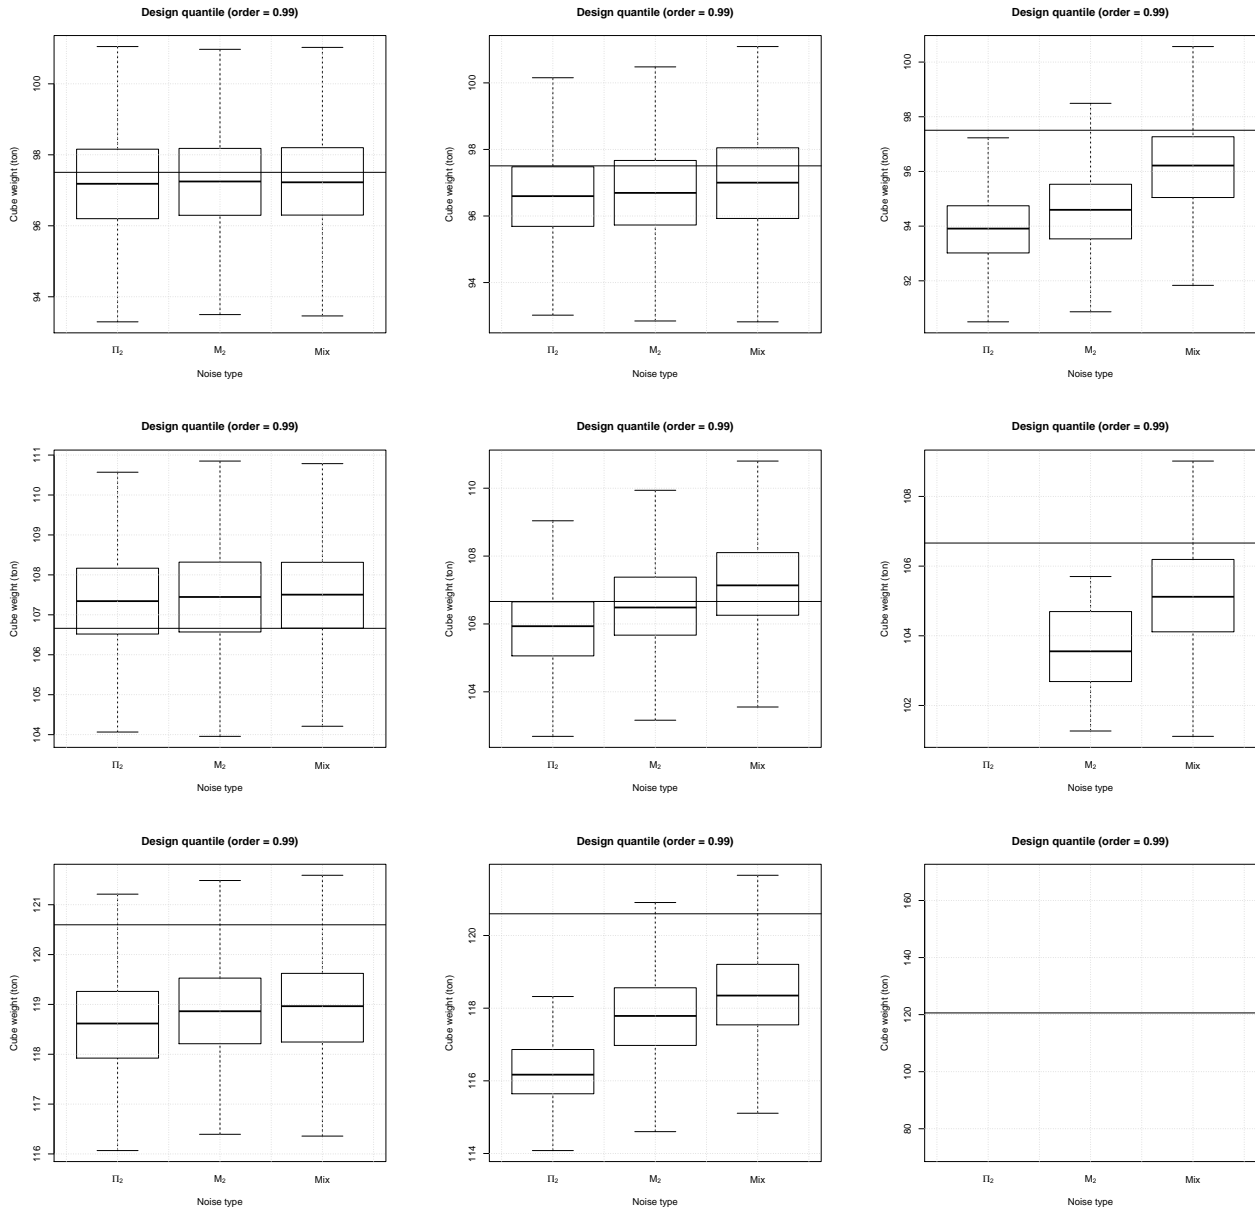

Figure 24: “Clayton” case:  $N = 300$ ,  $B = 2500$ ,  $q = 0.99$ . Same as Fig. 21.
